1  
2  
3  
4  
5  
6  
7  
8  
9  
10  
11  
12  
13  
14  
15  
16  
17  
18  
19  
20  
21  
22  
23  
24  
25  
26  
27  
28  
29  
30  
31  
32  
33

## Resolving Between Novelty and Homology in the Rapidly Evolving Phallus of *Drosophila*

Running Title: **Defining homology in a rapidly evolving tissue**

Gavin R. Rice<sup>1</sup>, Jean R. David<sup>2</sup>, Nicolas Gompel<sup>3</sup>, Amir Yassin<sup>2,4</sup>, Mark Rebeiz<sup>1\*</sup>

<sup>1</sup> Department of Biological Sciences, University of Pittsburgh, Pittsburgh, PA, USA

<sup>2</sup> Laboratoire Evolution, Génomes, Comportement, Ecologie (EGCE), UMR 9191, CNRS,IRD, Univ.Paris-Sud, Université Paris-Saclay, cedex, France

<sup>3</sup> Ludwig-Maximilians Universität München, Fakultät für Biologie, Biozentrum, Grosshaderner Strasse 2, 82152 Planegg-Martinsried, Germany

<sup>4</sup> Institut de Systématique, Evolution et Biodiversité, UMR7205, Centre National de la Recherche Scientifique, MNHN, Sorbonne Université, EPHE, Université des Antilles, 57 rue Cuvier, 75005 Paris, France

\* Correspondence: [rebeiz@pitt.edu](mailto:rebeiz@pitt.edu)

## 34 **Abstract**

35 The genitalia present some of the most rapidly evolving anatomical structures in the animal  
36 kingdom, possessing a variety of parts that can distinguish recently diverged species. In the  
37 *Drosophila melanogaster* group, the phallus is adorned with several processes, pointed  
38 outgrowths, that are similar in size and shape between species. However, the complex three-  
39 dimensional nature of the phallus can obscure the exact connection points of each process.  
40 Previous descriptions based upon adult morphology have primarily assigned phallic processes  
41 by their approximate positions in the phallus and have remained largely agnostic regarding  
42 their homology relationships. In the absence of clearly identified homology, it can be  
43 challenging to model when each structure first evolved. Here, we employ a comparative  
44 developmental analysis of these processes in eight members of the *melanogaster* species group  
45 to precisely identify the tissue from which each process forms. Our results indicate that adult  
46 phallic processes arise from three pupal primordia in all species. We found that in some cases  
47 the same primordia generate homologous structures whereas in other cases, different  
48 primordia produce phenotypically similar but remarkably non-homologous structures. This  
49 suggests that the same gene regulatory network may have been redeployed to different  
50 primordia to induce phenotypically similar traits. Our results highlight how traits diversify and  
51 can be redeployed, even at short evolutionary scales.

52

53 Key Words: Homology, *Drosophila*, Genitalia, rapid evolution

## 54 **Introduction:**

55           Most studies of developmental evolution depend on our ability to precisely compare the  
56 same body parts in different species or populations. Rigorously establishing such homology  
57 relationships allows us to identify novel traits, which are often defined by their lack of  
58 homology (Reviewed in Moczek, 2008; G. Wagner, 2007). Many of the current model systems  
59 for the study of novelty focus on traits that arose in the distant past (Bruce & Patel, 2020; Clark-  
60 Hachtel & Tomoyasu, 2020; Emlen, Szafran, Corley, & Dworkin, 2006; Hinman, Nguyen,  
61 Cameron, & Davidson, 2003), making the investigation of their molecular origins difficult. These  
62 traits likely arose through a multitude of genetic changes and exist in organisms that are less  
63 amenable to genetic studies. Recently evolved traits found in the rapidly evolving tissues of  
64 model organisms can provide qualitative changes in morphology produced by genomes that are  
65 easily compared and modified. However, rapidly evolving anatomical structures pose a distinct  
66 challenge. When differences between the anatomy of two species are numerous and  
67 exaggerated, it can be difficult to disentangle which structures are ancestral and which  
68 represent newly derived novelties. Thus, while macroevolutionary novelties often appear as  
69 clear discontinuities in the evolutionary record, the more molecularly tractable micro- and  
70 mesoevolutionary novelties require us to consider their relationships in a rich and complicated  
71 comparative context (Abouheif, 2008). Overcoming this challenge is thus critical to develop a  
72 genetic portrait of morphological novelty.

73           Most assertions of homology are defined through establishing that the structure in  
74 question connects to an unambiguously homologous tissue in both species (Moczek, 2008).  
75 Contentious claims of homology often revolve around the question of whether a set of traits

76 are formed by the same cells or tissues. These assertions can be strengthened through  
77 developmental analysis, where the primordium that initially forms the trait in question can be  
78 determined (Tanaka, Barmina, & Kopp, 2009). This type of analysis is especially important in  
79 complex three-dimensional traits, as resolution in the X, Y, and Z axes may be required. The  
80 high spatial resolution of confocal microscopy generates three-dimensional renderings of entire  
81 body parts, allowing us to define the position of structures relative to tissues that have  
82 straightforward homology assignments (Klaus, Kulasekera, & Schawaroch, 2003). Many  
83 developing tissues progressively become more complex over developmental time. The  
84 formation of specific traits is often established only after the tissue that encompasses that trait  
85 is identifiable, providing clear anchor points in a conserved tissue to establish homology. Thus,  
86 developmental trajectories provide a rich context in which to disentangle ambiguous  
87 relationships among rapidly evolving structures.

88         The terminalia (genitalia and analia) of drosophilids host an extensive assortment of  
89 rapidly evolving morphological structures. Variation of terminal structures is often one of the  
90 most reliable ways to differentiate species of *Drosophila* based on adult morphology (Bock &  
91 Wheeler, 1972; Hsu, 1949; Markow & O'Grady, 2006; Okada, 1954). The male genital structures  
92 are often divided into two major compartments: the periphallic parts surrounding the anus,  
93 which mostly play a role in grasping the external surface of the female genitalia (Acebes, Cobb,  
94 & Ferveur, 2003; Jagadeeshan & Singh, 2006; Kamimura & Mitsumoto, 2011; Masly &  
95 Kamimura, 2014; Mattei, Riccio, Avilaa, Wolfner, & Denlinger, 2015; Robertson, 1988; Yassin &  
96 Orgogozo, 2013), and the phallic parts (Figure 1), which comprise the intromittent organ. While  
97 the homology of the periphallic organs has always been relatively straightforward, the phallus

98 itself has posed several challenges in this regard. In particular, the homology of the various  
99 phallic processes, pointed outgrowths, remains controversial (Figure 2, Supplementary videos)  
100 (reviewed in Rice et al., 2019). These outgrowths have been implicated in sexual conflict  
101 between males and females, and in some species have been shown to physically interact with  
102 corresponding pockets in the female genitalia (Kamimura, 2016; Muto, Kamimura, Tanaka, &  
103 Takahashi, 2018; Yassin & Orgogozo, 2013) or induce copulatory wounds (Kamimura, 2007).  
104 Male seminal proteins can enter the female circulatory system through these copulatory  
105 wounds, and are associated with increased ovulation and reduced remating rates (Avila, Sirot,  
106 Laflamme, Rubinstein, & Wolfner, 2011; Kamimura, 2010). To better understand how genital  
107 morphology may coevolve we must better establish which homologous tissues have been  
108 modified in each sex.

109         Two major sources have contributed to confusion regarding homology of phallic  
110 processes. The first is the relationship of the postgonal sheath (referred to as aedeagal sheath  
111 in Rice et al., 2019) with respect to these processes (Figure 2 H-I). Several authors consider the  
112 postgonal sheath and postgonal processes (referred to as postgonites in Rice et al., 2019) of *D.*  
113 *melanogaster* as substructures of a unified tissue that was usually referred to as the “posterior  
114 parameres” (Bock & Wheeler, 1972; Okada, 1954; Tsacas, Bocquet, Daguzan, & Mercier, 1971).  
115 While others designated the postgonal sheath as a separate tissue from the postgonal  
116 processes (Al Sayad & Yassin, 2019; Bächli, Vilela, Andersson Escher, & Saura, 2004; Lachaise et  
117 al., 2004). The three-dimensional nature and the presence of transparent cuticle has made it  
118 difficult to determine the precise connection points of the processes to the tissues of the  
119 phallus. Determining whether these processes were formed by a single or separate primordium

120 would help resolve this discordance. The second source of confusion is in regard to the  
121 nomenclature used to compare the phallic processes in different members of the *melanogaster*  
122 species group. The term “basal process” has been used to refer to a number of pointed  
123 outgrowths that are attached to different phallic tissues in different species (Kamimura, 2007,  
124 2010, 2016; Kamimura & Mitsumoto, 2011, 2012a, 2012b; Kamimura & Polak, 2011). Such a  
125 designation implies a concept of homology independent of the exact anatomical position.  
126 Yassin & Orgogozo (2013) sought to provide distinct terms, such as “spurs” and “hooks” for  
127 outgrowths emanating from the same tissue, implying the potential for non-homology. Building  
128 upon our recent revision of the male terminalia nomenclature of *D. melanogaster* (Rice et al.,  
129 2019), developmental studies presented here allow us to provide a more detailed, homology-  
130 informed nomenclature for these structures.

131         In this study, we characterized both the adult morphology and the development of the  
132 pupal genitalia in five members of the *melanogaster* species subgroup and three outgroup  
133 members from the larger *melanogaster* species group. This analysis allows us to determine  
134 whether processes are homologous or of different origins. Tracing the development of the  
135 phallus by confocal microscopy showed that all processes arise from three distinct pupal  
136 primordia in all species. We found both that several similarly shaped processes arise from  
137 distinct primordia, whereas in other cases, distinct processes arise from different parts of the  
138 same primordium. In light of these analyses, we refined the identity and terminology of the  
139 phallic processes and identify distinct homology groups. We map these different morphologies  
140 on previously established phylogenies and identified multiple gain, loss, and homoplastic events

141 in the history of these diverse structures. Thus, our results demonstrate how developmental  
142 approaches can resolve unclear relationships among rapidly evolving structures.

143 **Figure 1:**

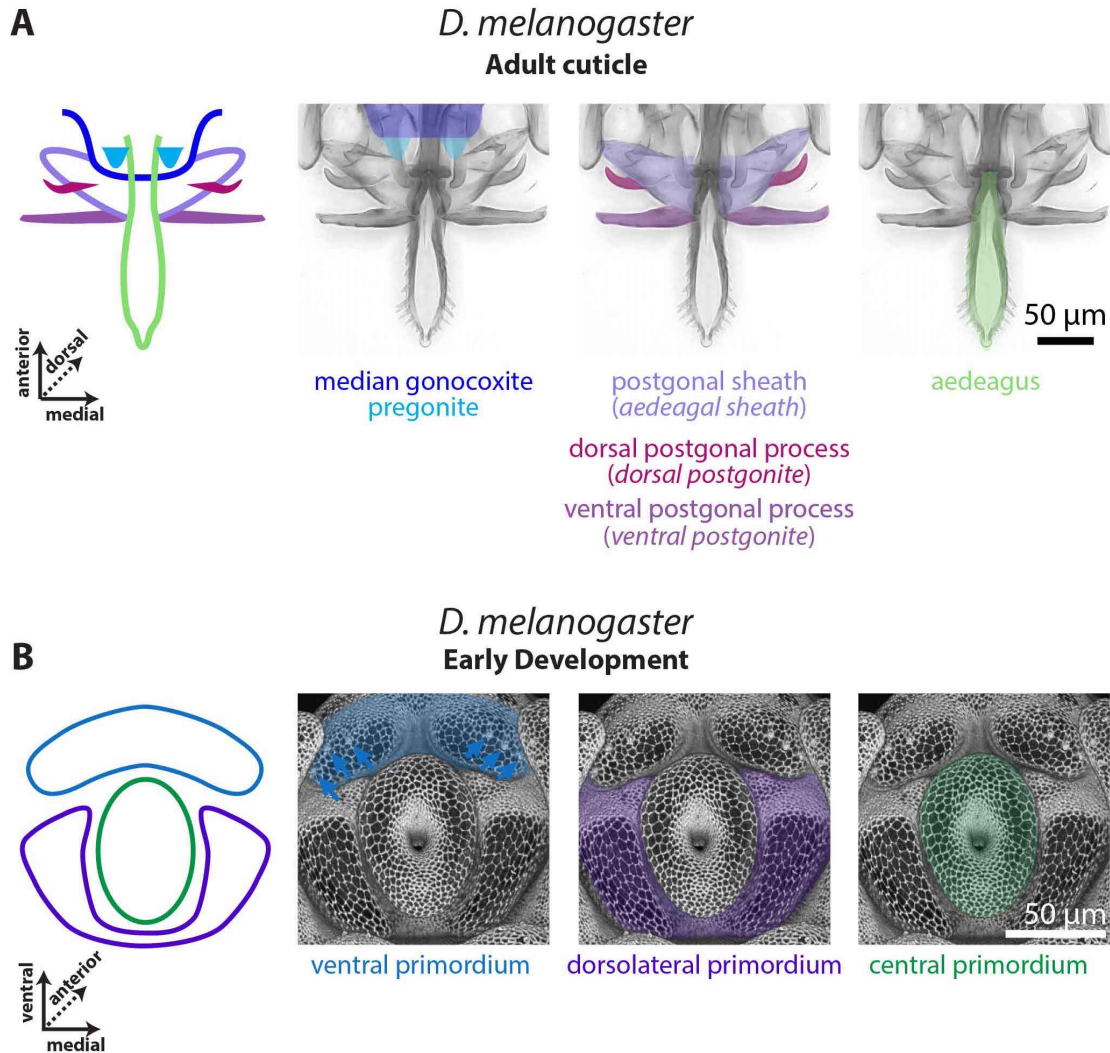

144

145

146 Figure 1: The *D. melanogaster* pupal phallus is produced by three primordia

147

148 **A)** Left: A schematic representation of the adult phallus of *D. melanogaster*, the median  
 149 gonocoxite outlined in dark blue, the pregonites highlighted in light blue, the postgonal sheath  
 150 in light purple, the dorsal postgonal process in magenta, the ventral postgonal process in violet,  
 151 and the aedeagus in light green. Right: the adult phallus of a *yw;+:+* line of *D. melanogaster*. **B)**  
 152 Left: A schematic representation of the early developing pupal genitalia of *D. melanogaster*.  
 153 The primordia of developing phallus with the ventral primordium in blue, the dorsolateral  
 154 primordium in purple, and the central primordium in green. Right: Developing pupal phallus of  
 155 a *D. melanogaster* arm-GFP transgenic line. Apical cellular junctions are shown, highlighting the  
 156 overall morphology. Blue arrows indicate the position of the pregonal bristles. Aedeagal sheath  
 157 is an alternative term for postgonal sheath, ventral postgonite is an alternative term for ventral  
 158 postgonal process, and dorsal postgonite is an alternative term for dorsal postgonal process.



159 **Figure 2**

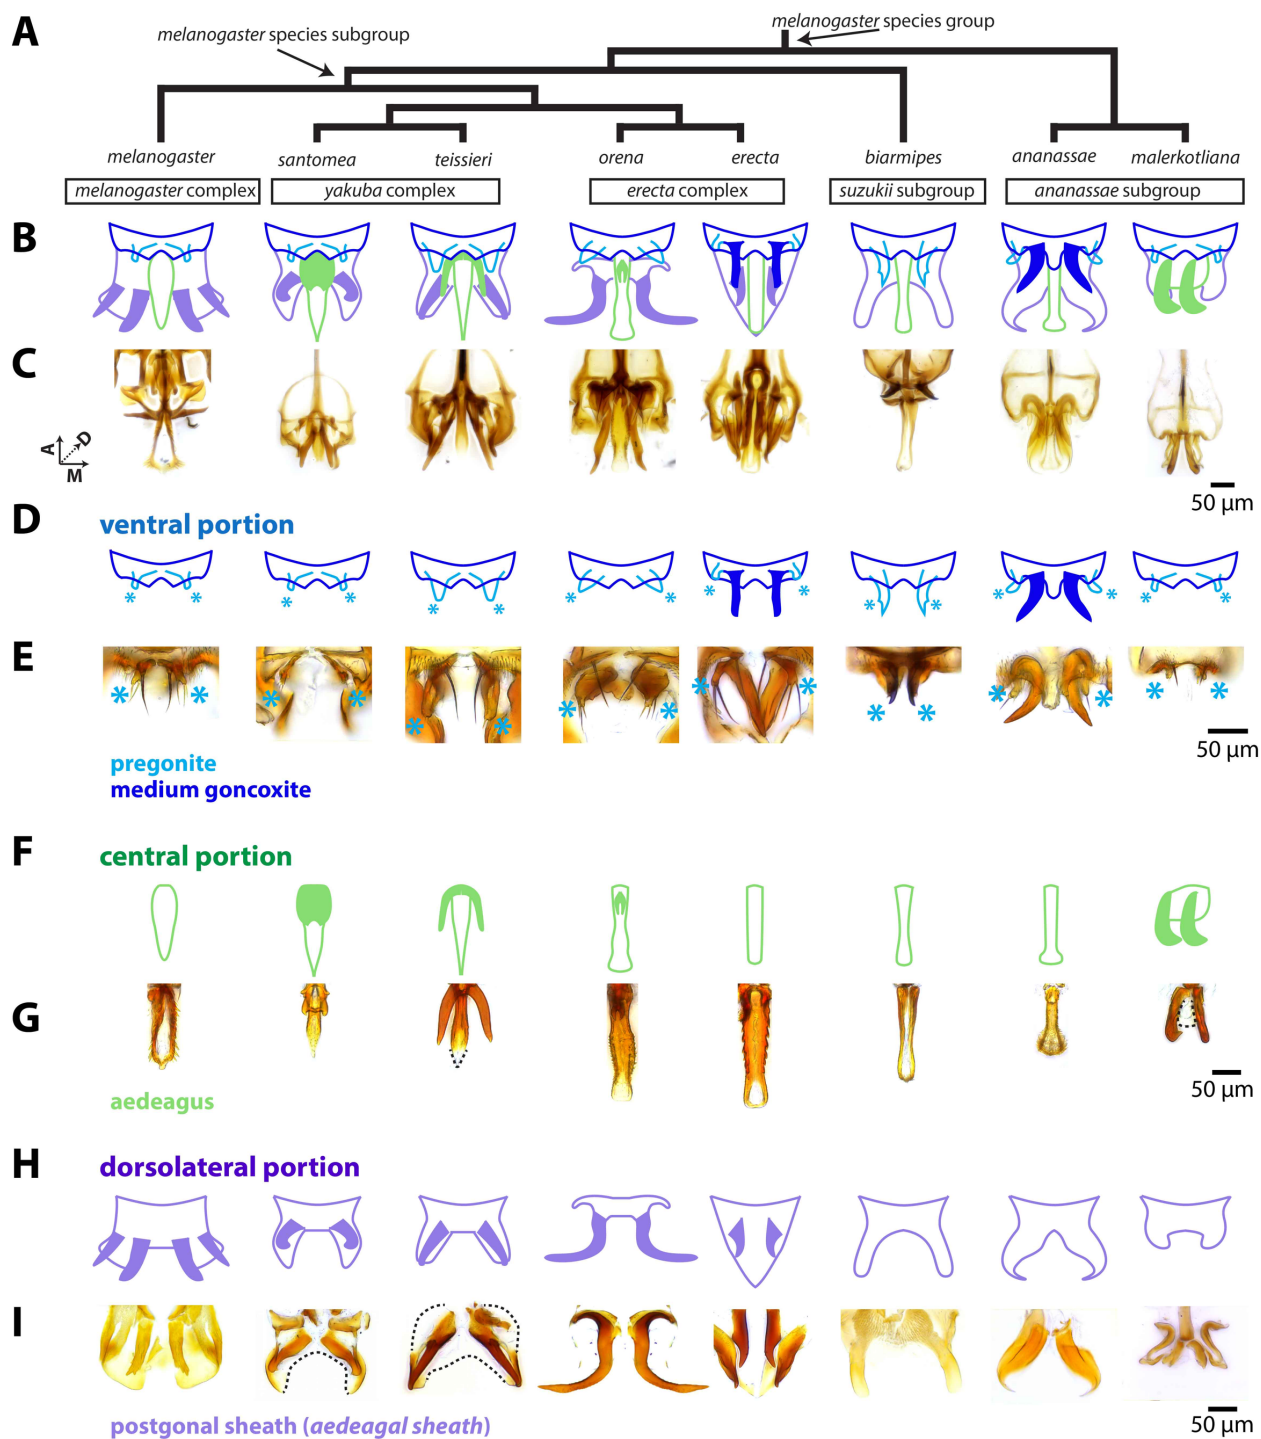

160

161 Figure 2: The rapidly evolving phallus is composed of three main components

162

163 **A)** Phylogeny for eight species of the *melanogaster* species group based on Obbard et al., 2012  
 164 with nodes that contain the *melanogaster* species subgroup and *melanogaster* species group

165 indicated by arrows. **B)** A schematic breakdown of the adult phalluses of each species. **C)** Light  
166 microscopy images of the whole adult phallus for each species. Image stacks that show the  
167 relative position of each part can be found in Supplementary videos **D)** Schematic  
168 representation of the ventral portion of the phallus (dark blue) which contains the pregonites  
169 (light blue) and processes (filled in dark blue) in *D. erecta* and *D. ananassae*. Light blue asterisks  
170 designate the position of the pregonites. **E, G, I)** Light microscopy images of microdissections of  
171 the adult phallus (here in lateral view, distal end pointing downward) separated in the ventral,  
172 central, and dorsolateral portions. **E)** Microdissections of the ventral portion processes shows  
173 the processes of *D. erecta* and *D. ananassae* are connected to the pregonites. Light blue  
174 asterisks designate the position of the pregonites. **F)** Schematic representation of the central  
175 portion of the phallus (light green), which contains processes (filled in light green) in *D.*  
176 *santomea*, *D. teissieri*, *D. orena*, and *D. malerkotliana*. **G)** Microdissections of the aedeagus  
177 confirms that the processes are physically attached to aedeagus. The aedeagus of the *D.*  
178 *malerkotliana* (dashed line) is translucent with only the process sclerotized. **H)** Schematic  
179 representation of the dorsolateral portion of the phallus (light purple), which contains two pairs  
180 of processes (filled in light purple) in *D. melanogaster*, and one pair in *D. santomea*, *D. teissieri*,  
181 *D. erecta*, and *D. orena*. **I)** Microdissection confirms that the processes are physically attached  
182 to postgonal sheath. In *D. santomea*, *D. teissieri*, *D. erecta*, and *D. malerkotliana* portions of the  
183 anterior postgonal sheath are translucent (outlined with dashed lines). The image of the *D.*  
184 *orena* dorsolateral portion was created by copying and mirroring one side of the structure, as it  
185 was difficult to flatten intact for imaging. Aedeagal sheath is an alternative term for postgonal  
186 sheath.

## 187 **Materials and Methods:**

### 188 *Drosophila strains:*

189 To study the evolution of the phallic processes in the *melanogaster* species subgroup we used  
190 the following subset of described species, representing all major complexes: *D. santomea*  
191 (Lachaise et al., 2000), *D. teissieri* (Tsacas, 1971), *D. orena* (Tsacas & David, 1978), *D. erecta*  
192 (Tsacas & Lachaise, 1974), *D. melanogaster* (Meigen, 1830) from the *melanogaster* species  
193 subgroup and the following outgroup species *D. biarmipes* (Malloch, 1924) from the *suzukii*  
194 subgroup, *D. ananassae* (Doleschall, 1858), and *D. malerkotliana* (Parshad & Paika, 1964) from  
195 the *ananassae* subgroup. Previous work has investigated the function of the copulatory  
196 anatomy of all species we analyzed (Kamimura, 2007, 2016; Muto et al., 2018; Yassin &  
197 Orgogozo, 2013). Stocks were obtained from both the National Drosophila Species Stock Center  
198 at Cornell (*D. santomea* (14021-0271.01), *D. teissieri* (14021-0257.01), *D. orena* (14021-  
199 0245.01), *D. erecta* (14021-0224.01), *D. biarmipes* (14023-0361.09), *D. ananassae* (14024-  
200 0371.13), the Bloomington Drosophila Stock Center *D. melanogaster* armadillo-GFP, arm-GFP,  
201 (Bloomington stock number #8556), and from the lab of Dr. Thomas Williams, *D. malerkotliana*.

202

### 203 *Sample collection, dissection, and fixation:*

204 Male white pre-pupae were collected at room temperature and incubated in a petri dish  
205 containing a moistened Kimwipe at 25°C prior to dissection. After incubation, pupae were  
206 impaled in their anterior region and immobilized within a glass dissecting well containing  
207 Phosphate Buffered Saline (PBS). The posterior tip of the pupa (20–40% of pupal length) was  
208 separated and washed with a P200 pipette to flush the pupal terminalia into solution. Samples

209 were then collected in PBS with 0.1% Triton-X-100 (PBT) and 4% paraformaldehyde (PFA, E.M.S.  
210 Scientific) on ice, and multiple samples were collected in the same tube. Samples were then  
211 fixed in PBT + 4% PFA at room temperature for 30 min, washed three times in PBT at room  
212 temperature, and stored at 4°C.

213

214 *Immunohistochemistry and microscopy:*

215 After fixation developing pupal genitalia of all species except *D. melanogaster* were stained  
216 with rat anti-E-cadherin, 1:100 in PBT (DSHB Cat# DCAD2,RRID:AB\_528120) overnight at 4°C,  
217 followed by an overnight at 4°C incubation with anti-rat 488, 1:200 (Invitrogen, Carlsbad, CA) to  
218 visualize apical cell junctions. For *D. melanogaster*, an *armadillo*-GFP tagged line (Bloomington  
219 stock number #8556) was used to visualize apical cell junctions (Huang et al., 2012).  
220 Fluorescently labeled samples were mounted in glycerol mounting solution (80% glycerol, .1M  
221 Tris, pH 8.0) on microscope slides coated with poly-L-lysine (Thermo Fisher Scientific #86010).  
222 Samples for all species except *D. melanogaster* were imaged at 20X on a Leica TCS SP8 confocal  
223 microscope. *D. melanogaster* samples were imaged at either 20X or 40X on an Olympus  
224 Fluoview 1000. As the imaged structures are three-dimensional in nature, we used the program  
225 MorphoGraphX (de Reuille et al., 2015) to render and manipulate images in three-dimensions.  
226 This allowed us to rotate the samples to better present the most informative perspectives of  
227 the various phallic structures.

228 For light microscopy of adult phallic microdissections, samples were mounted in PVA  
229 Mounting Medium (BioQuip) until fully cleared and imaged at 20X magnification on a Leica DM  
230 2000 with a Leica DFC450C camera and the resulting images were enhanced using Adobe

231 Photoshop. For light microscopy images and videos of whole phallus samples, genitalia were  
232 dissected in water, cleared overnight in 10% KOH at RT. Mounted in a drop of Dimethyl  
233 Hydrantoin Formaldehyde (Steedman, 1958) on a coverslip and oriented using 2 mounting  
234 needles before the resin hardens. Coverslip were positioned on a microscope slide, the hard  
235 drop facing away from the microscope lens. Images were acquired on Ti2-Eclipse Nikon  
236 microscope equipped with a 20x plan apochromatic lens and a 5.5 M sCMOS camera (PCO,  
237 Kelheim, Germany). Each preparation was imaged as a z-stack (z-step = 2  $\mu\text{m}$ ). The stacks are  
238 presented as raw images. Stacks of images were also projected into single extended depth-of-  
239 field images using Helicon Focus software (HeliconSoft) and the resulting projections were  
240 enhanced using Adobe Photoshop.

241

242 *Establishing designated early, middle, and late timepoints:*

243 We used confocal microscopy to establish a time course of the developing phallus (Figures S1-  
244 S3). To compare the development of the phallus of these species, we needed to examine  
245 whether all analyzed species develop at the same rate after pupal formation. Due to the large-  
246 scale changes seen in the phallus of these species we used two stable features found outside of  
247 the phallus to calibrate developmental timing. In all analyzed species, the epandrial ventral lobe  
248 (lateral plate) and surstylus (clasper) first appear as a single continuous structure early in  
249 development but then separate from each other as development progresses (Figure S2). We  
250 use the beginning of this separation as a landmark for the “early” developmental timepoint. We  
251 also used the midpoint of this progression to approximate the “mid” timepoint. This  
252 intermediate timepoint is useful in showing which tissue the phallic processes protrude from

253 during development. In all species, the adult cerci (anal plates) directly abut against one  
254 another but during “early” and “mid” development, these structures are separated from one  
255 another by a large gap (Figure S3). We designate “late” timepoint as directly preceding the  
256 closing of this gap between the cerci.

257 **Results:**

258 *Unpigmented cuticle reveals undescribed connection points in the phallus*

259           In order to better understand how the processes surrounding the aedeagus are  
260 physically connected to the neighboring tissues of the phallus, we imaged whole (Figure 2 B,C)  
261 and micro-dissected adult phalluses in eight members of the *melanogaster* species group  
262 (Figure 2 D-I). The phallus of each species can be broken into three discrete parts. The ventral  
263 portion (Figure 2 D,E) contains the pregonites, an outgrowth that contains three bristles, and  
264 the median gonocoxite (the central section of the shield shaped hypandrium). The central  
265 portion (Figure 2 F,G) contains the aedeagus, through which sperm is transferred. The  
266 dorsolateral portion contains the postgonal sheath (referred to as aedeagal sheath in (Rice et  
267 al., 2019)), a flat sheet that wraps around the aedeagus and the pair of processes known as the  
268 postgonal processes (referred to as postgonites in Rice et al., 2019) (Figure 2 H,I). Analysis of  
269 these dissections support the designation of the postgonal sheath and postgonal processes as a  
270 single tissue (Bock & Wheeler, 1972; Okada, 1954; Tsacas et al., 1971). Furthermore, we found  
271 that certain species had processes connected to different portions of the phallus—ventral  
272 portion (*D. erecta*, *D. ananassae*), central portion (*D. santomea*, *D. teissieri*, *D. orena*, and *D.*  
273 *malerkotliana*), dorsolateral portion (all members of the *melanogaster* subgroup).

274           While imaging, we observed that parts of the postgonal sheath in the *melanogaster*  
275 species subgroup and *D. malerkotliana* were partially translucent, and only easily visible after  
276 microdissection. It is this translucent tissue of the postgonal sheath that physically connects to  
277 the postgonal processes in *D. melanogaster*. These observations highlight that, due to their  
278 transparency, determining the exact connection points between the processes and the rest of

279 the phallus can be difficult to visualize by traditional light microscopy approaches. To test  
280 whether the different connection points of the phallic processes observed in the adult reflect  
281 separate homology groups we investigated whether these phallic processes were initially  
282 produced by the same or different primordia during development.

283

#### 284 *Phallic structures develop from three primordia in D. melanogaster*

285 To date, the morphogenesis of the three-dimensional adult phallic structures from the  
286 epithelium of the larval genital disc has been investigated only in *D. melanogaster* (Ahmad &  
287 Baker, 2002; Epper, 1983). Additionally, using surgical fragmentation of the larval genital disc,  
288 Bryant & Hsei, 1977 provided a fate map for the different adult structures. They showed that  
289 the phallus is situated at the subcenter of the symmetrical imaginal disc and is surrounded on  
290 each side by a primordium that will produce the medium gonocoxite and pregonites. However,  
291 the sequence and timing of the appearance of the various substructures of the phallus during  
292 development, remains unknown. By finding the key points in development where substructures  
293 first emerge, we can determine the primordium from which each process initially form.

294 Early in *D. melanogaster* pupal development (see timepoint designation in the Materials  
295 and Methods) the phallus is separated into three primordia: ventral, dorsolateral and central  
296 (Figure 1B). As the pupal phallus continues to develop from this point, the ventral primordia  
297 form a pair of processes (Figure 1A). This pair develops into the small processes known as the  
298 pregonites that can be recognized from the presence of the minute bristles (Figure 1B arrows).  
299 The dorsolateral primordia produce two processes (one dorsal and one ventral) (Figure 3B).  
300 These processes ultimately develop into the ventral and dorsal postgonal processes (referred to



301 as ventral postgonite and dorsal postgonite in Rice et al., 2019) (Figure 1A). The remaining parts  
302 of the dorsolateral tissue develop into the large flaps of the postgonal sheath (Figure 1A). The  
303 central primordium of *D. melanogaster* develops into the aedeagus and lacks a process (Figure  
304 1A).

305

306 *The three primordia are conserved across species*

307         Several studies have analyzed pupal development of the terminalia in species outside of  
308 *D. melanogaster*, but did not investigate phallic structures (Glassford et al., 2015; Hagen et al.,  
309 2019; Smith, Davidson, & Rebeiz, 2019). To determine whether the features of phallic  
310 development observed in *D. melanogaster* are conserved in members of the *melanogaster*  
311 species group, we produced a developmental time course for the remaining seven species  
312 studied here (Figure S1-S3). We found that all adult phallic organs develop from three  
313 primordia similar to the ones described in *D. melanogaster*. Nonetheless, significant  
314 interspecific differences were observed regarding the timing of development (Figure S1). As we  
315 only used one strain per species, we cannot comment if these are particular properties of the  
316 strains/laboratory conditions we used or are general differences between the species. We  
317 found that most species had early, mid, and late developmental timepoints within a six-hour  
318 window of each other, while *D. oreana* and *D. teissieri* showed particularly divergent  
319 developmental timing (Figure S1-S3).

320

321 *Different processes emerge from different primordia*

322           The developmental analysis of the eight species used in this study allowed us to test  
323 whether the phallic processes seen in the adults of each species were produced by the same  
324 primordia. We began by investigating the ventral primordium (Figure 3, Figure S4), which  
325 develops into the pregonites in all analyzed species. While the size of the pregonites varies  
326 between species, during mid-development (Figure 4B) we can identify recognizable outgrowths  
327 from the ventral primordium, consistent with a highly conserved developmental trajectory.  
328 Interestingly, an additional pregonal process is found in two distantly-related species, *D. erecta*  
329 and *D. ananassae*. Both *D. erecta* and *D. ananassae*, produce two processes from their ventral  
330 primordia, a large pregonal medial process and a second smaller lateral process which contains  
331 the three pregonal bristle cells and overall resembles the pregonites of other species. To  
332 determine whether this additional process was produced by duplication or fission of the  
333 pregonite we inspected early pupal timepoints. We found that initially a single process is  
334 formed (Figure 3A), which during mid-development asymmetrically splits along the medial-  
335 lateral axis to form the distinct lobe-like pregonal medial process (Figure 3B). These asymmetric  
336 projections then extend in late development to form the larger pregonal medial process and  
337 smaller pregonite (Figure 3C). Thus, although the ventral primordium produces the pregonite in  
338 all species we examined, in *D. erecta* and *D. ananassae* the ventral primordium is split into the  
339 pregonite and a pregonal medial process.

340           The dorsolateral primordium (Figure 4, Figure S5) showed a number of large  
341 evolutionary changes within the *melanogaster* species group. We found that no species, other  
342 than *D. melanogaster*, develop the ventral process that forms the ventral postgonal process  
343 (Figure 4). By contrast, all members of the *melanogaster* species subgroup form dorsal

344 postgonal processes. Outside of the *melanogaster* subgroup, we did not find any modifications  
345 of the dorsolateral primordium, which develops into a single thin, strongly sclerotized structure  
346 in those species that resembles the postgonal sheath of *D. melanogaster*. However, the size,  
347 and shape of these homologous structures significantly differ among species (Figure 2 H,I),  
348 ranging from the flat rod-like processes in *D. biarmipes*, to the strongly pointed sinuate  
349 processes in *D. ananassae*, and the minute, transparent sclerites in *D. malerkotliana*.

350 While the central primordium (Figure 5, Figure S6) forms a simple aedeagus that lacks  
351 processes in *D. melanogaster*, we note processes which develop in *D. santomea*, *D. teissieri*, *D.*  
352 *orena* and *D. malerkotliana*. Early in development, the central primordia of all species analyzed  
353 are similar in size and shape (Figure 5A). However, during mid-development, in *D. santomea*, *D.*  
354 *teissieri*, and *D. orena*, the ventral side of the central primordium elongates to form a process  
355 (Figure 5B). The process of *D. teissieri* and *D. orena* splits along the ventral midline to form a  
356 pair of processes, while in *D. santomea*, it forms one rounded structure. These processes  
357 further elongate in late development to more closely resemble the size and shape of their adult  
358 counterparts (Figure 5C).

359 Okada, 1954 and Bock & Wheeler, 1972 suggested that the aedeagus in the  
360 *melanogaster* species group were of two types: fused like in *D. ananassae* and split like in *D.*  
361 *malerkotliana*. Indeed, we did not observe any process in the central primordium of *D.*  
362 *ananassae*, whereas a pair of processes develops in *D. malerkotliana*. Kamimura, 2007  
363 suggested that the aedeagus of *D. malerkotliana* has degenerated and was replaced by a pair of  
364 lateral processes. During early development, the central primordium of *D. malerkotliana* is  
365 similar to all other analyzed species (Figure 5A). However, by mid-development, the lateral

366 sides of the central primordium extend, forming a pair of processes, while the medial-dorsal  
367 and medial-ventral sides of the central primordium fail to extend (Figure 5B). Late in  
368 development, the proximal-dorsal side of the lateral process constricts, conferring a hook like  
369 shape (Figure 5C). As this substructure is produced from the lateral portions of the central  
370 primordium and not from the ventral portion, it is likely non-homologous to the aedeagal  
371 ventral processes of the *yakuba* and *erecta* complexes. We therefore propose the term  
372 aedeagal lateral process for this substructure of *D. malerkotliana*.

373 **Figure 3:** *melanogaster* *teissieri* *orena* *erecta* *biarmipes* *ananassae*

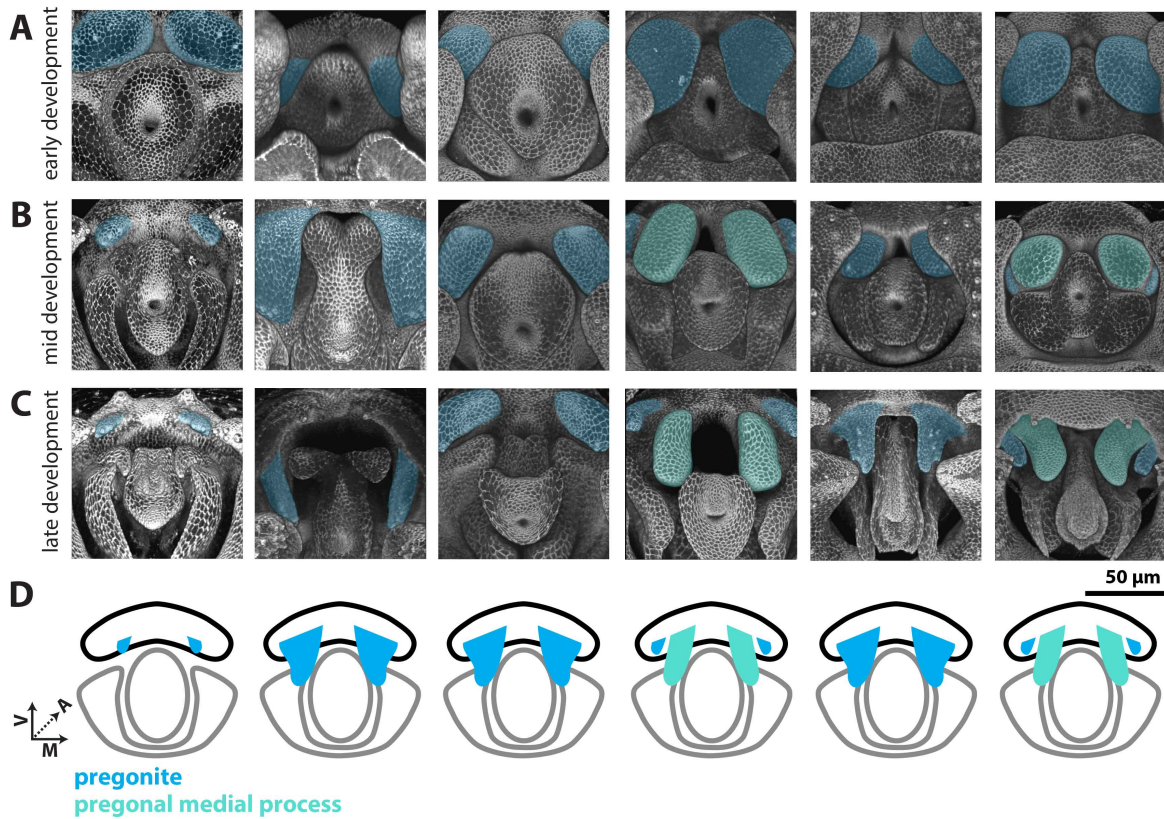

375 Figure 3: Processes developing from the ventral primordium are found in all members of the  
 376 *melanogaster* species group.

377  
 378 **A-C)** Signal from the apical cellular junctions was used to highlight the overall morphology of  
 379 developing pupal genitalia. *D. teissieri*, *D. orena*, *D. erecta*, *D. biarmipes*, and *D. ananassae* were  
 380 stained for ECAD while apical cell junctions were visualized in *D. melanogaster* by detecting  
 381 *arm-GFP* (see methods). **A)** Early in development, a pair of processes, that will form the  
 382 pregonites, can be visualized in the ventral primordia in all species shown (light blue). **B)** By  
 383 mid-development, large processes can be found in all species except *D. melanogaster*. In *D.*  
 384 *erecta* and *D. ananassae*, the pregonite is split into a large pregonal medial process and a small  
 385 lateral bristle-bearing process. **C)** By late development, the pregonites have extended to their  
 386 full adult size and shape. The pregonites are connected to the medial-ventral portion of the  
 387 median gonocoxite, see Figure S4. **D)** Schematic representations of the pregonites (blue) and  
 388 pregonal medial process (teal) showing their approximate size, number, and connections to the  
 389 median gonocoxite (outlined in black). All images have the same axes, V (Ventral), A (Anterior),  
 390 M (Medial) and are the same scale.

391 **Figure 4:**

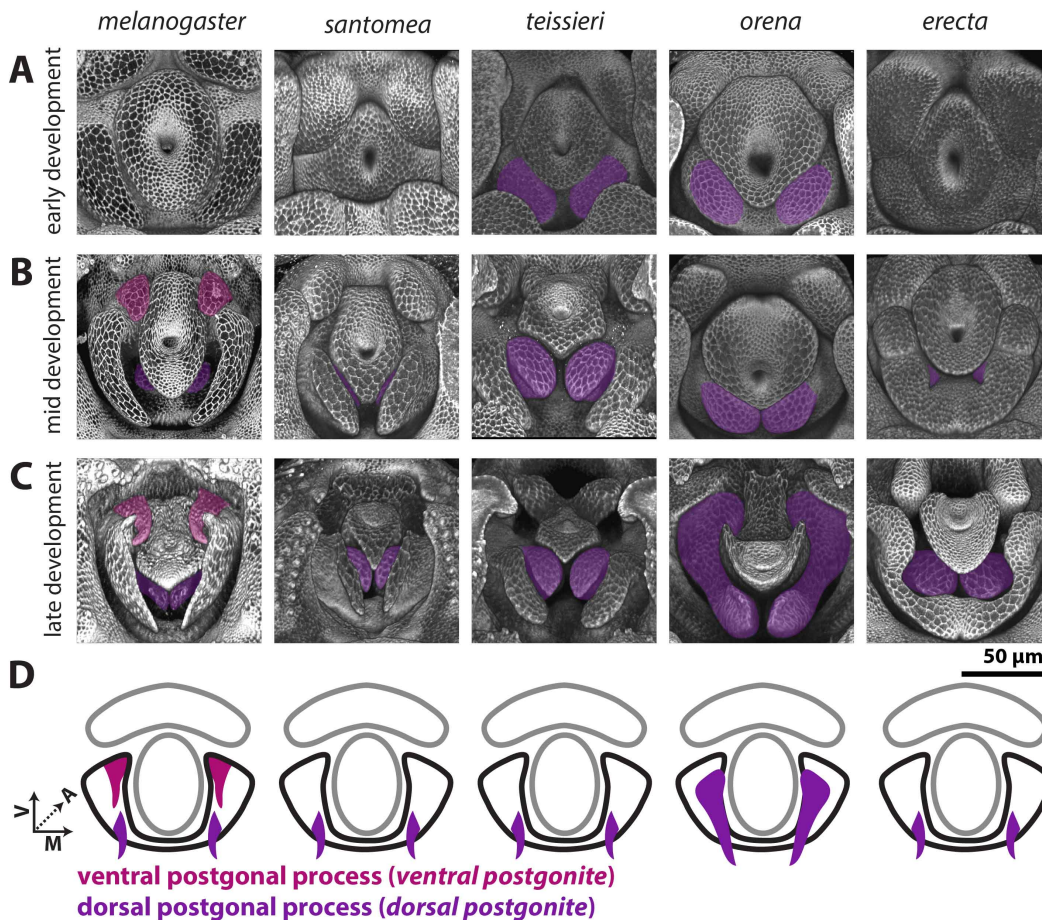

392

393 Figure 4: Processes produced by the dorsolateral primordium are found only in the  
 394 *melanogaster* subgroup.

395

396 **A-C)** Signal from the apical cellular junctions was used to highlight the overall morphology of  
 397 developing pupal genitalia. *D. santomea*, *D. teissieri*, *D. orena*, and *D. erecta*, were stained for  
 398 ECAD while *D. melanogaster* samples used arm-GFP. **A)** Early in development, the dorsolateral  
 399 primordium is a smooth lobe like structure in all analyzed species. **B)** By mid-development, all  
 400 shown species form processes in the dorsal portion of the dorsolateral primordium (violet). *D.*  
 401 *melanogaster* also forms an additional pair of processes in the ventral portion of dorsolateral  
 402 primordium (magenta). **C)** By late development, the dorsal and ventral processes have  
 403 extended to a long thin shape. Both the ventral and dorsal processes are connected to the  
 404 medial-anterior part of the postgonal sheath which is formed by the remaining tissue of the  
 405 dorsolateral primordium. **D)** Schematic representations of the dorsal (violet) and ventral  
 406 (magenta) postgonal process showing where they connect to the postgonal sheath (outlined in  
 407 black). All images have the same axes, V (Ventral), A (Anterior), M (Medial) and are the same  
 408 scale. Ventral postgonite is an alternative term for ventral postgonal process, and dorsal  
 409 postgonite is an alternative term for dorsal postgonite.

410 **Figure 5:**

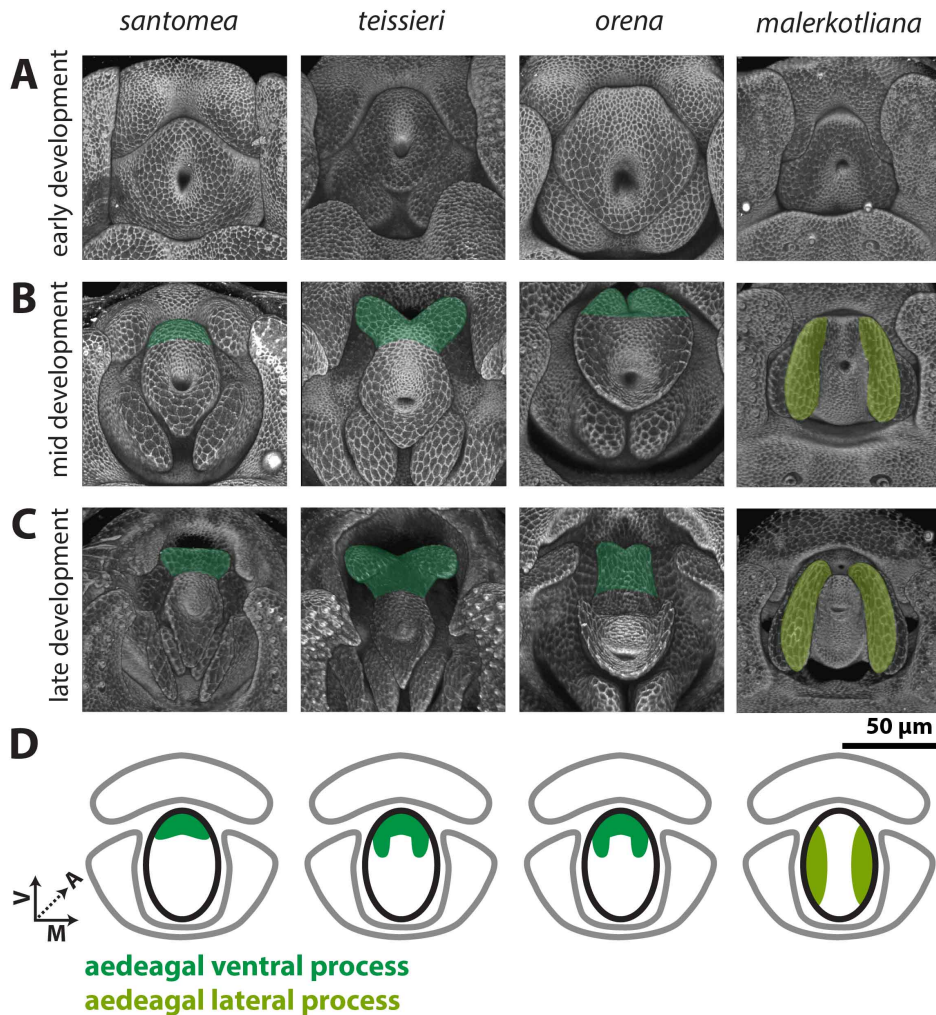

411

412 Figure 5: Processes developing from the central primordium are found in the *yakuba/erecta*  
 413 and *biplectinata* complexes.

414

415 **A-C)** Signal from the apical cellular junctions was used to highlight the overall morphology of  
 416 developing pupal genitalia. *D. santomea*, *D. teissieri*, *D. orena*, and *D. erecta*, were stained for  
 417 ECAD. **A)** Early in development, the central primordium forms a flat donut-shaped structure in  
 418 all species shown. **B)** By mid-development, the ventral portion of the aedeagus is extended in *D.*  
 419 *santomea*, *D. teissieri*, and *D. orena* in what will form the aedeagal ventral process (dark green).  
 420 In *D. malerkotliana* the lateral edges of the central primordium extend anteriorly in what will  
 421 form the aedeagal lateral process (yellow-green). **C)** By late development, the aedeagal ventral  
 422 process and the aedeagal lateral process further extend from the aedeagus. **D)** Schematic  
 423 representations of the aedeagal ventral process (dark green) and aedeagal lateral process  
 424 (yellow-green) showing where they connect to the aedeagus (outlined in black). All images have  
 425 the same axes, V (Ventral), A (Anterior), M (Medial) and are the same scale.

426 **Figure 6:**

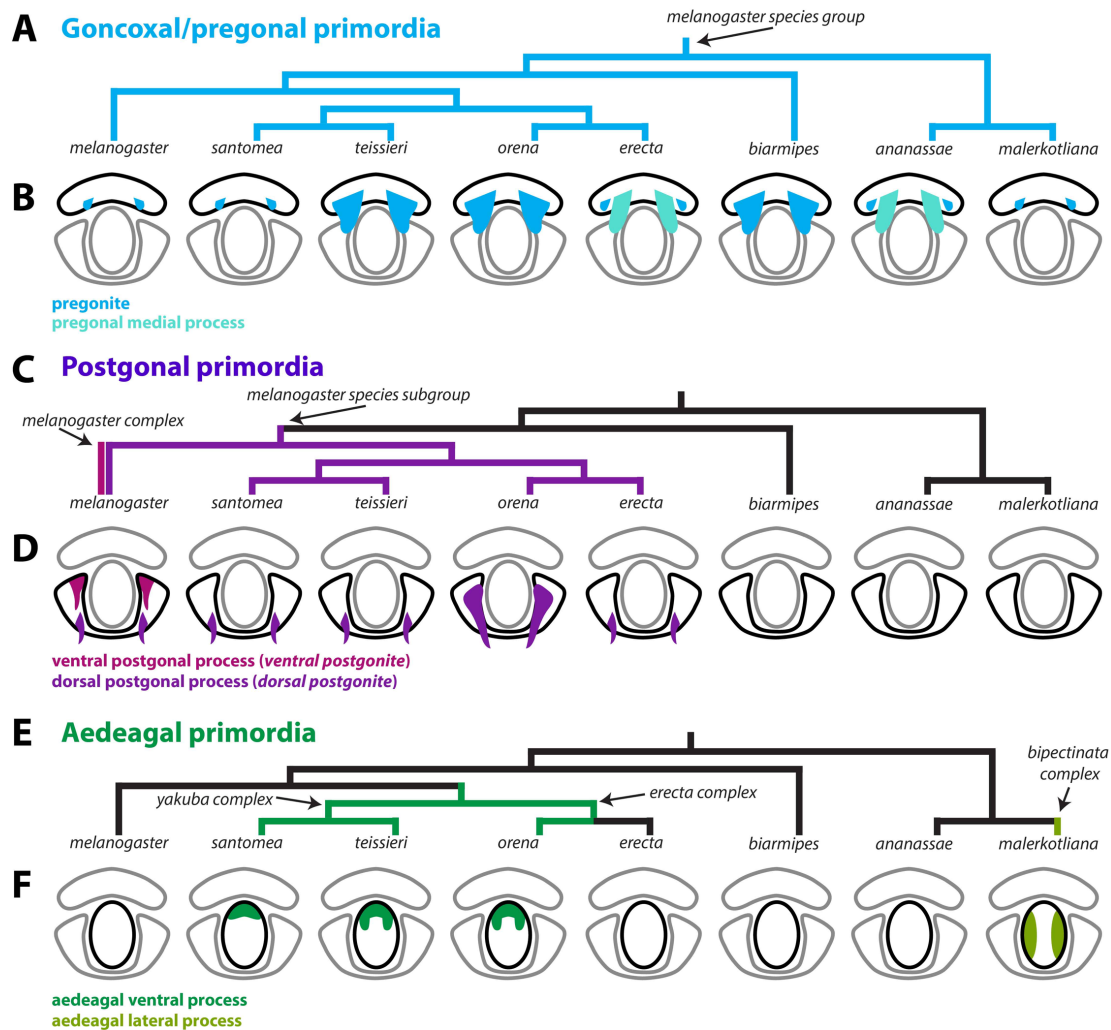

427

428 Figure 6: Model of the evolutionary of phallic processes in the *melanogaster* species group

429

430 **A,C,E)** Phylogeny of the 8 analyzed species; based on Obbard et al., 2012. **A)** Parsimony suggests  
 431 that the pregonites originated outside of the *D. melanogaster* species group. **B)** Light blue  
 432 represents the pregonites and teal represents the pregonal medial process. **C)** Parsimony  
 433 suggests that the ventral postgonites originated in the *melanogaster* complex (*D. melanogaster*,  
 434 *D. simulans*, *D. mauritiana*, *D. sechellia*) and that the dorsal postgonal process originated in the  
 435 melanogaster subgroup. **D)** Violet represents the ventral postgonal process, magenta  
 436 represents the dorsal postgonal process. **E)** Parsimony suggests that the aedeagal ventral  
 437 process originated at the base of the *erecta* and *yakuba* complexes. Additionally, parsimony  
 438 suggests that the aedeagal lateral process originated in the bipectinate complex. **F)** Dark green  
 439 represents the aedeagal ventral process and yellow-green represents the aedeagal lateral  
 440 process. Ventral postgonite is an alternative term for ventral postgonal process, and dorsal  
 441 postgonite is an alternative term for dorsal postgonite.



## 442 **Discussion:**

443           The rapid evolution of morphological structures is an attractive subject for study, as it  
444 allows us to glimpse at the molecular and genetic causes of dramatically remodeled and  
445 restructured anatomical forms. Here, we examined some of the most rapidly evolving  
446 morphologies of *Drosophila melanogaster* and its close relatives. Despite decades of research,  
447 many of the intricate phallic processes have eluded our ability to clearly classify their homology  
448 relationships. By studying the developmental trajectories of these processes in multiple species,  
449 we have better defined their physical connections, and clarified which structures most likely  
450 share ancestry. This research highlights the distinct challenges in studying novelties at  
451 mesoevolutionary scales.

452

### 453 *Classification and nomenclature of rapidly evolving phallic structures*

454           Our results suggest that the great diversity of the phallic structures of the eight species  
455 studied here cluster into three homology groups corresponding to the three pupal primordia,  
456 leading us to propose revised naming conventions. First, our developmental analysis supports  
457 the notion, initially suggested by Okada, 1954, that the weakly sclerotized postgonal sheath and  
458 strongly sclerotized postgonal processes in *D. melanogaster*, are both parts of the same tissue,  
459 which *Drosophila* systematists called the “posterior paramere” e.g. (Bock & Wheeler, 1972;  
460 Tsacas et al., 1971). Because the term “posterior paramere” is itself synonymous to the term  
461 “postgonite” in Dipteran systematics (Tsacas et al., 1971; van Emden & Hennig, 1970), we  
462 suggest using the term “postgonite” to encompass the combined tissue produced by the  
463 dorsolateral primordia in species of the *melanogaster* group (including both the postgonal

464 sheath and the processes), and the term “postgonal processes” to designate the strongly  
465 sclerotized branches emerging from this tissue in the *melanogaster* subgroup. Second, our  
466 results also show that the structures previously called the “basal processes” (Kamimura, 2007,  
467 2010, 2016; Kamimura & Mitsumoto, 2011, 2012a, 2012b; Kamimura & Polak, 2011), develop  
468 from different primordia and are therefore most likely non-homologous. We suggest therefore  
469 to give them distinct names that directly relate to the tissues that produce them: aedeagal  
470 ventral process in species of the *yakuba* complex (synonymous to Yassin & Orgogozo, 2013  
471 phallic spur) and *D. orena* (synonymous to Yassin & Orgogozo, 2013 phallic hook), the pregonal  
472 medial process in *D. erecta* and *D. ananassae*, and aedeagal lateral process in *D. malerkotliana*  
473 and species of the *biplectinata* complex (Table 1).

474

#### 475 *Evolution of the phallic structures*

476 Mapping character states over robust phylogenies provide the opportunity to  
477 distinguish novel from recurrent (homoplastic) states as well as derived states (synapomorphic)  
478 from ancestral (symplesiomorphic) ones (Figure 6). For example, our demonstration of the  
479 development of an additional pregonal process in *D. erecta* and *D. ananassae* is likely recurrent,  
480 as illustrations from Bock & Wheeler, 1972 suggest that this configuration of the pregonites  
481 might have recurrently evolved in this clade. Reversals to ancestral states through secondary  
482 losses represent another mechanism of recurrent evolution. The lack of the aedeagal ventral  
483 processes in *D. erecta*, is more likely due to loss rather than an independent gain of the  
484 aedeagal ventral process in *D. orena*.

485           In the *melanogaster* subgroup, all species contain a strongly-sclerotized dorsal  
486 postgonal process which develops as a localized extension within the dorsolateral primordium.  
487 The development of a strongly-sclerotized ventral postgonal process is a definitive novelty in *D.*  
488 *melanogaster* and allied species of the *melanogaster* complex. Although we did not find  
489 structures resembling the dorsal postgonal processes in members outside of the *melanogaster*  
490 species subgroup that we studied here, polarization remains difficult. Indeed, Okada, 1954 and  
491 Bock & Wheeler, 1972 reported the presence of “basal processes of the posterior parameres”  
492 in multiple members of the *melanogaster* species group. Similarly, Bächli et al., 2004 illustrated  
493 the presence of “ribbon-shaped process” in several members of the *obscura* group which is  
494 sister to the *melanogaster* species group. Further taxonomic sampling and better phylogenetic  
495 resolution of those clades are required to draw a more complete picture of the evolution of the  
496 postgonal differentiation outside the *melanogaster* subgroup. The novel structures described  
497 here may present an excellent model to study the molecular mechanisms producing novelty.

498           Although we do not address the function of the phallic processes, other research groups  
499 have associated these with sexual conflict. The various processes of the phallus have been  
500 implicated in copulatory wounding of the female (Kamimura, 2007, 2016; Muto et al., 2018;  
501 Yassin & Orgogozo, 2013). Furthermore, studies have found that some of the phallic processes  
502 pivot from pointing posteriorly to pointing laterally, when the phallus is everted during  
503 copulation, thus directing how they interact with the female reproductive tract (Kamimura,  
504 2010). The ability to pivot during copulation correlates with the homology groups we have  
505 found in this study. The ventral and dorsal postgonal processes, and pregonites pivot during  
506 copulation while the aedeagal ventral process does not change orientation. This may be due to

507 the direct connection of the aedeagal ventral process to the aedeagus. Surprisingly the  
508 aedeagal lateral process, which is also directly connected to the aedeagus, pivots laterally  
509 during copulation, which may only be possible due to the loss of aedeagal sclerotization,  
510 making the tissue between the aedeagal lateral processes flexible. Co-evolution between the  
511 phallic processes and the female genitalia has been suggested and several novel modifications  
512 of the female genitalia have been identified (Kamimura, 2007; Yassin & Orgogozo, 2013). A  
513 developmental analysis of the female genitalia of these species along with three-dimensional  
514 analysis of copulating flies similar to studies in *D. melanogaster* (Mattei et al., 2015; Shao et al.,  
515 2019) would provide vital context for the potential co-evolution of novel male and female  
516 structures.

517

#### 518 *Developmental mechanisms underlying phallic evolution*

519 A major challenge in the evo-devo field has been to identify the molecular mechanisms  
520 driving morphological novelty (Linz, Hu, & Moczek, 2020; Moczek, 2008; Rebeiz, Patel, &  
521 Hinman, 2015; G. P. Wagner & Lynch, 2010). While macroevolutionary novelties have been the  
522 focus of coarse-grained molecular study (Bruce & Patel, 2020; Clark-Hachtel & Tomoyasu, 2020;  
523 Emlen et al., 2006; Hinman et al., 2003; Prud'Homme et al., 2011), much hope has been placed  
524 on rapidly diverging structures in molecularly amenable systems (Rebeiz & Tsiantis, 2017). Our  
525 work highlights distinct underexplored challenges to interpreting and advancing these model  
526 systems. The ambiguous ancestry of similar parts which appear in different locations causes us  
527 to consider multiple models to explain their emergence. These parts may arise by parallelism –  
528 a predisposition to drive similar new structures by co-opting the same networks (Abouheif,

529 2008). Alternately, it is entirely possible that these structures are indeed ancestral but have  
530 undergone massive tissue reorganizations to reposition their attachment points. Such  
531 repositioning could be caused by moving the location of a critical signal or transcription factor  
532 within the tissues. Alternately, these structures could be specified before the discernable  
533 tissues of the phallus are separated, and their migration could be caused by differences in  
534 tissue folding. Under this scenario, we would anticipate that critical tissue patterning regulators  
535 of these processes are activated before these tissues become discernable. Finally, it is entirely  
536 possible that completely different networks account for the appearance of these unique  
537 structures. Developmental genetic analysis of the genes that produce the phallic processes  
538 described above will aid us in distinguishing these models. Recent work has identified several  
539 genes that are spatially restricted to the pregonites and postgonal processes of *D.*  
540 *melanogaster* providing an ideal set of candidates to examine (Vincent et al., 2019). Thus, we  
541 envision that detailed mechanisms of parallelism, repositioning, and novelty will emerge from  
542 studying systems where both network architecture is accessible, and genetic manipulations can  
543 be introduced to test the sufficiency of these mechanisms to produce these novel  
544 morphological structures.

545 **Acknowledgments:**

546 We would like to thank Deepak Dharmadhikari for his help with imaging, the Cornell Species  
547 and Bloomington Stock Centers for providing fly strains used in this study, Ben Vincent and the  
548 Rebeiz lab for their comments on the project and manuscript, Virginie Courtier-Orgogozo,  
549 Masanori Toda, Yoshitaka Kamimura and the Terminalia consortium for their insights on this  
550 project. We would also like to thank TaxoDros and the Japan Drosophila Database for their  
551 work cataloging resources for the original species descriptions for those analyzed.

552 **Tables:**

**New nomenclature**

**Previous terminology**

|                           |                                                                                                                                                                                                                    |
|---------------------------|--------------------------------------------------------------------------------------------------------------------------------------------------------------------------------------------------------------------|
| postgonite                | posterior paramere (Bock & Wheeler, 1972; Tsacas et al., 1971)                                                                                                                                                     |
| dorsal postgonal process  | dorsal postgonite (Rice et al., 2019; Vincent et al., 2019)<br>dorsal branch (Kamimura, 2010, 2016; Kamimura & Mitsumoto, 2011)<br>dorsal paramere (Bryant & Hsei, 1977)                                           |
| ventral postgonal process | ventral postgonite (Rice et al., 2019; Vincent et al., 2019)<br>ventral branch (Kamimura, 2010; Kamimura & Mitsumoto, 2011)<br>ventral paramere (Bryant & Hsei, 1977)                                              |
| aedeagal ventral process  | phallic spur (Yassin & Orgogozo, 2013)<br>phallic hook (Yassin & Orgogozo, 2013)<br>ventral branch (Kamimura, 2012, 2016; Kamimura & Mitsumoto, 2012b, 2012a; A. E. Peluffo et al., 2015; A. Peluffo et al., 2021) |
| aedeagal lateral process  | basal process (Kamimura, 2007; Kamimura & Polak, 2011)                                                                                                                                                             |
| pregonal medial process   | basal process (Kamimura, 2007), ventral branch (Kamimura, 2016)                                                                                                                                                    |

553 Table 1: Table of correspondence between terms previously used in publications and proposed  
554 nomenclature.

555 **Supplemental figures:**

556 **Figure S1:**

557

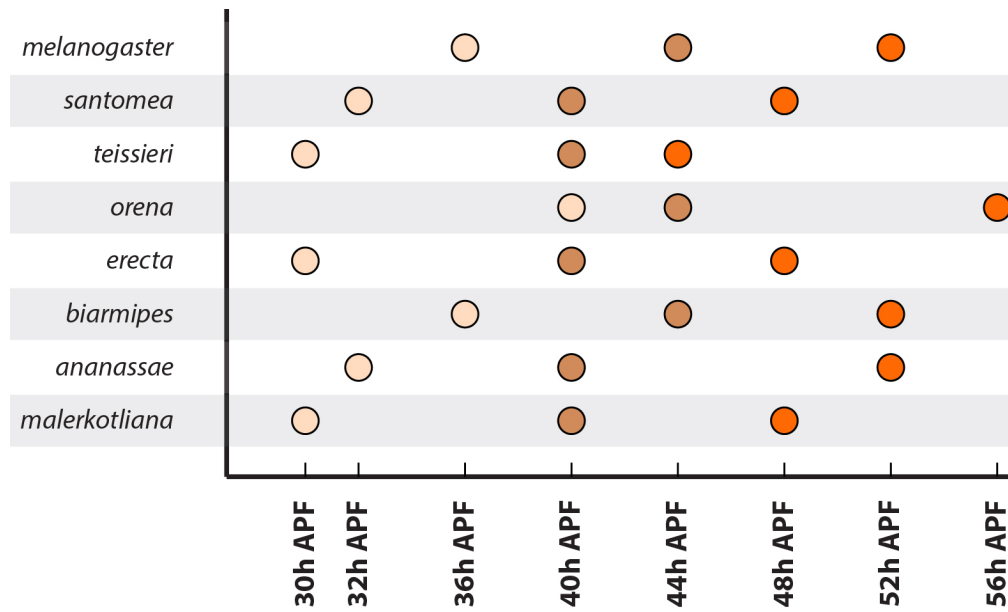

558 ○ early timepoint ● mid timepoint ● late timepoint

559 Figure S1:

560

561 A summary of our designations of early (beige) mid (brown) and late (orange) developmental  
562 timepoints for each species.



563 **Figure S2:**

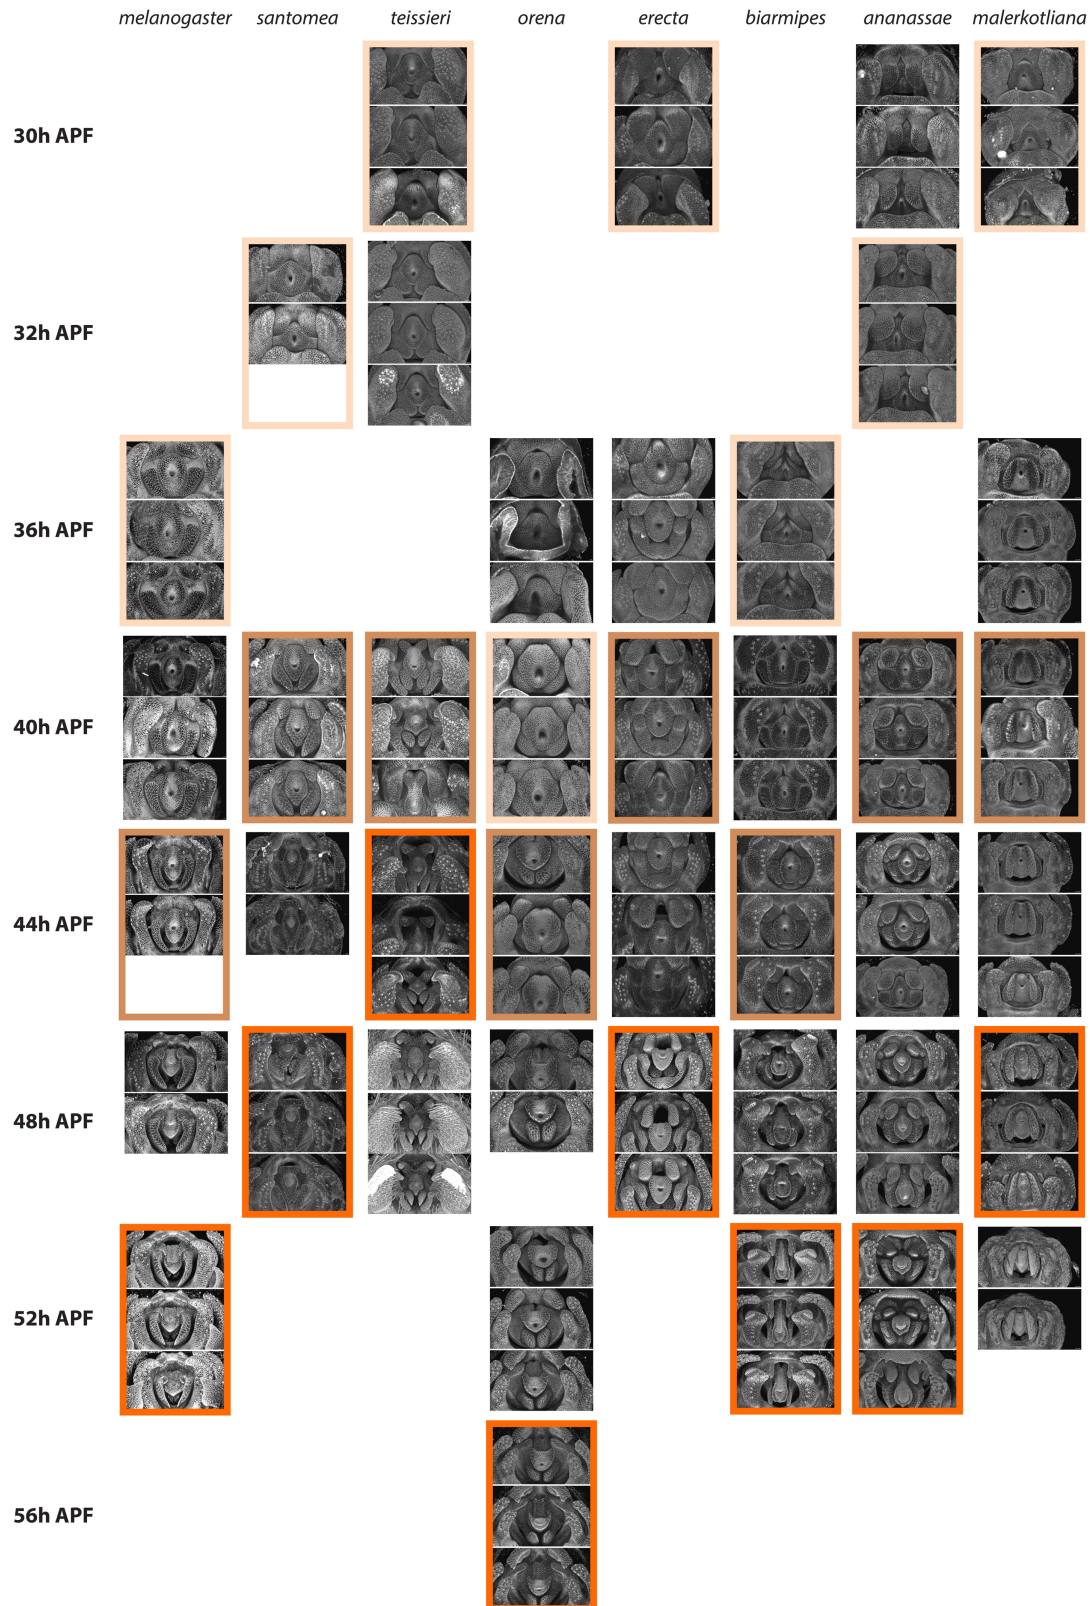

564

565 Figure S2:  
566  
567 Full ECAD time course of ventral genitalia across the *melanogaster* species group.  
568 Developing pupal genitalia of *D. santomea*, *D. teissieri*, *D. orena*, *D. erecta*, *D. biarmipes*, *D.*  
569 *ananassae*, and *D. malerkotliana* stained for ECAD, apical cellular junctions, highlighting the  
570 overall morphology. Note that *D. melanogaster* samples use a transgenic line arm-GFP that also  
571 labels the apical cell junctions.

572

**Figure S3:**

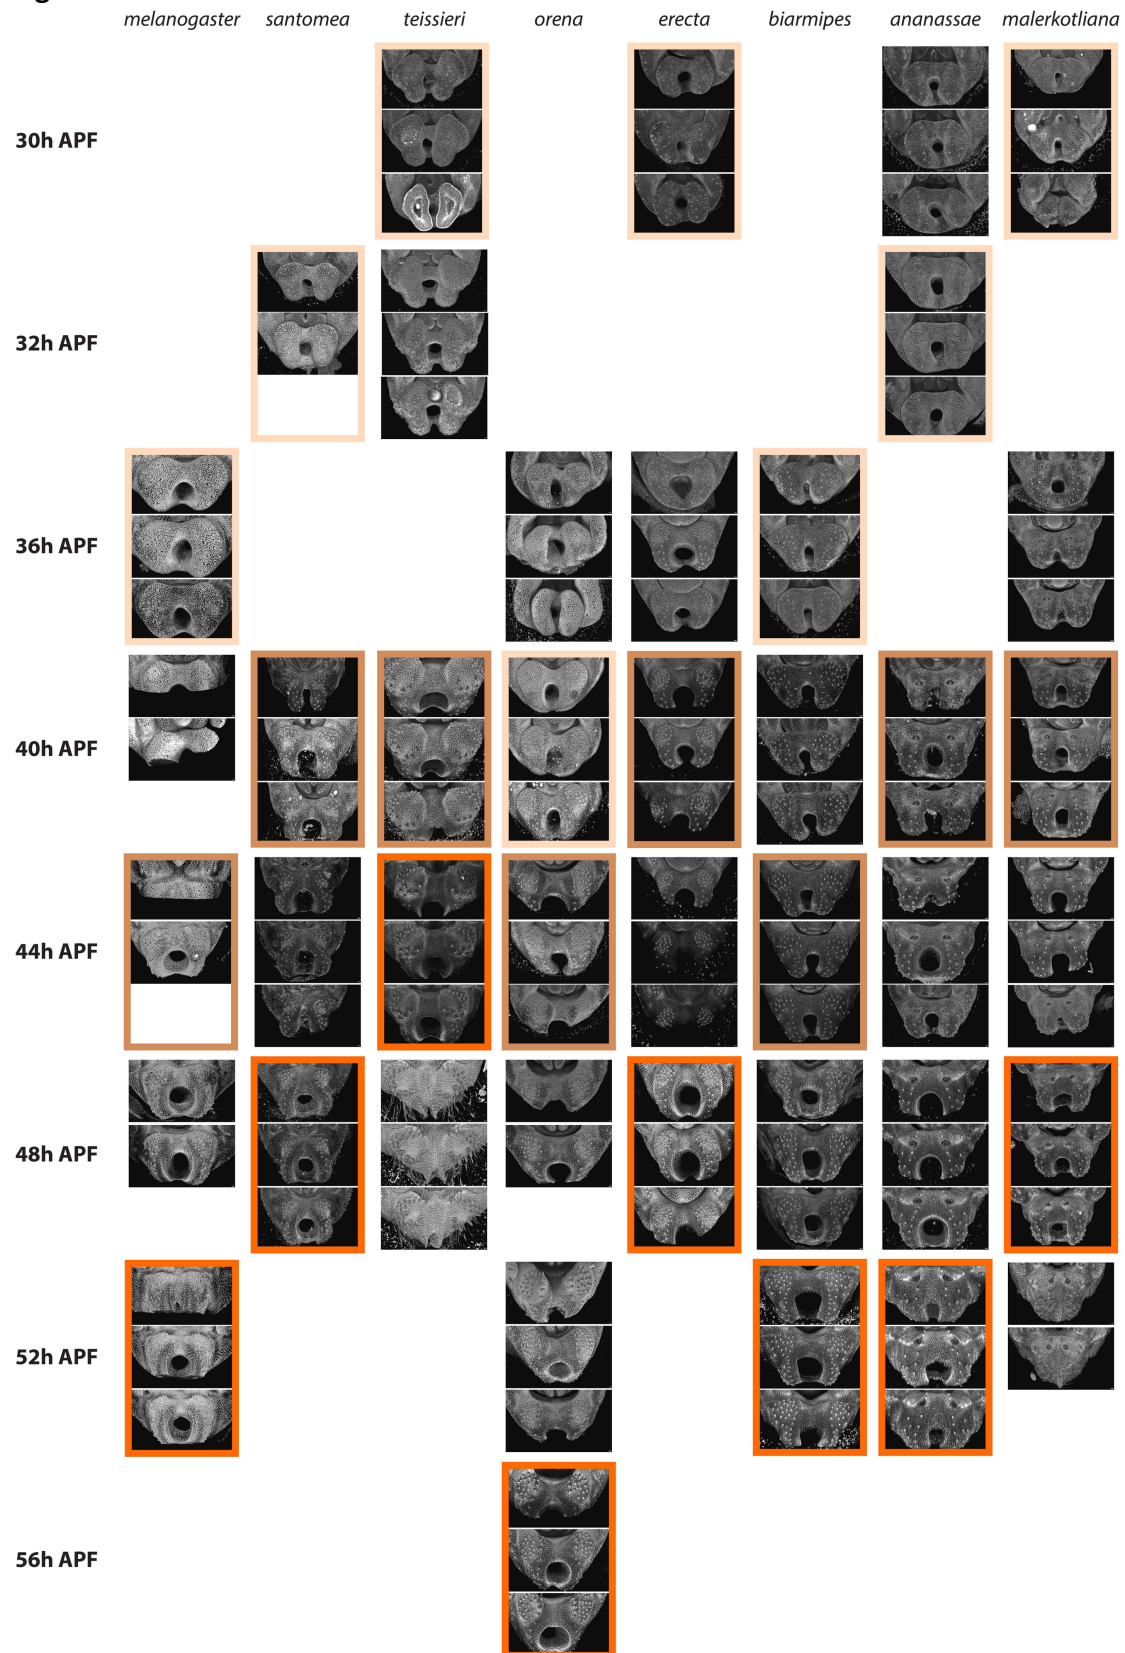

573

574 Figure S3:  
575  
576 Full ECAD time course of dorsal genitalia across *melanogaster* species group.  
577 Developing pupal genitalia of *D. santomea*, *D. teissieri*, *D. orena*, *D. erecta*, *D. biarmipes*, *D.*  
578 *ananassae*, and *D. malerkotliana* stained for ECAD, apical cellular junctions, highlighting the  
579 overall morphology. Note that *D. melanogaster* samples use a transgenic line arm-GFP that also  
580 labels the apical cell junctions.

581 **Figure S4:**

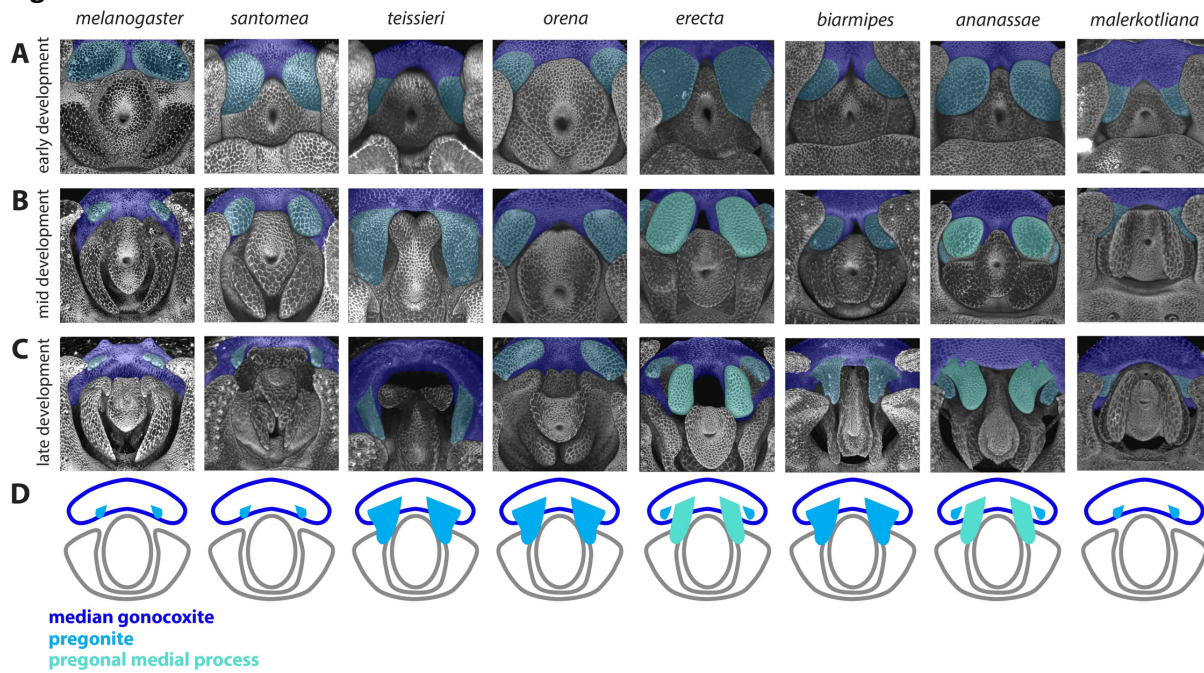

582  
583

584 **Figure S4:**

585

586 Developing ventral primordia of all analyzed species. For *D. melanogaster* an arm-GFP line of  
587 was used to highlight the apical cellular junctions. **A-C)** The median gonocoxite is highlighted in  
588 dark blue, the pregonite is highlighted in with light blue, and the pregonal medial process is  
589 highlighted in teal **D)** Schematic representation of the median gonocoxite (dark blue), the  
590 pregonite (light blue), pregonal medial process (teal). Note that *D. melanogaster* samples use a  
591 transgenic line arm-GFP that also labels the apical cell junctions, while all other samples are  
592 stained for E-cadherin.

593

**Figure S5:**

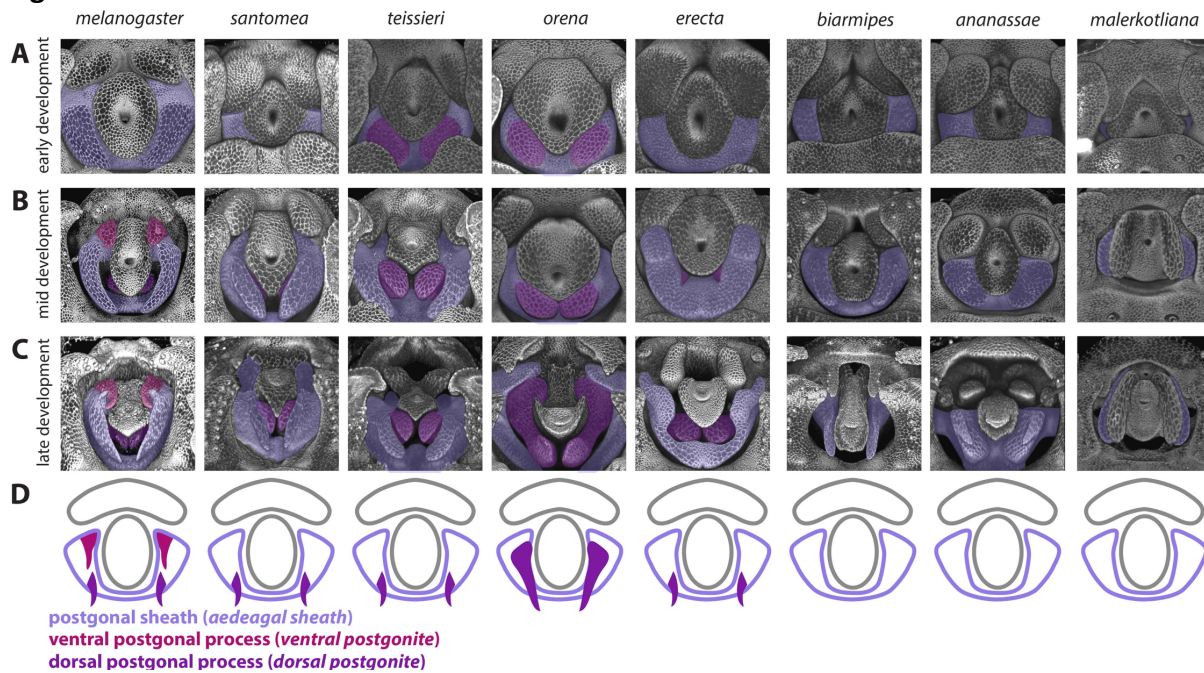

594

595

596

597

598

599

600

601

602

603

604

605

**Figure S5:**

Developing dorsolateral primordia of all analyzed species. For *D. melanogaster* an arm-GFP line of was used to highlight the apical cellular junctions. **A-C)** The postgonal sheath is highlighted in light purple, the ventral postgonal process is highlighted in with violet, and the dorsal postgonal process is highlighted in magenta **D)** Schematic representations of the postgonal sheath (light purple), the ventral postgonal process (violet), and dorsal postgonal process (magenta). Aedeagal sheath is an alternative term for postgonal sheath, ventral postgonite is an alternative term for ventral postgonal process, and dorsal postgonite is an alternative term for dorsal postgonal process. Note that *D. melanogaster* samples use a transgenic line arm-GFP that also labels the apical cell junctions, while all other samples are stained for E-cadherin.

606 **Figure S6:**  
607

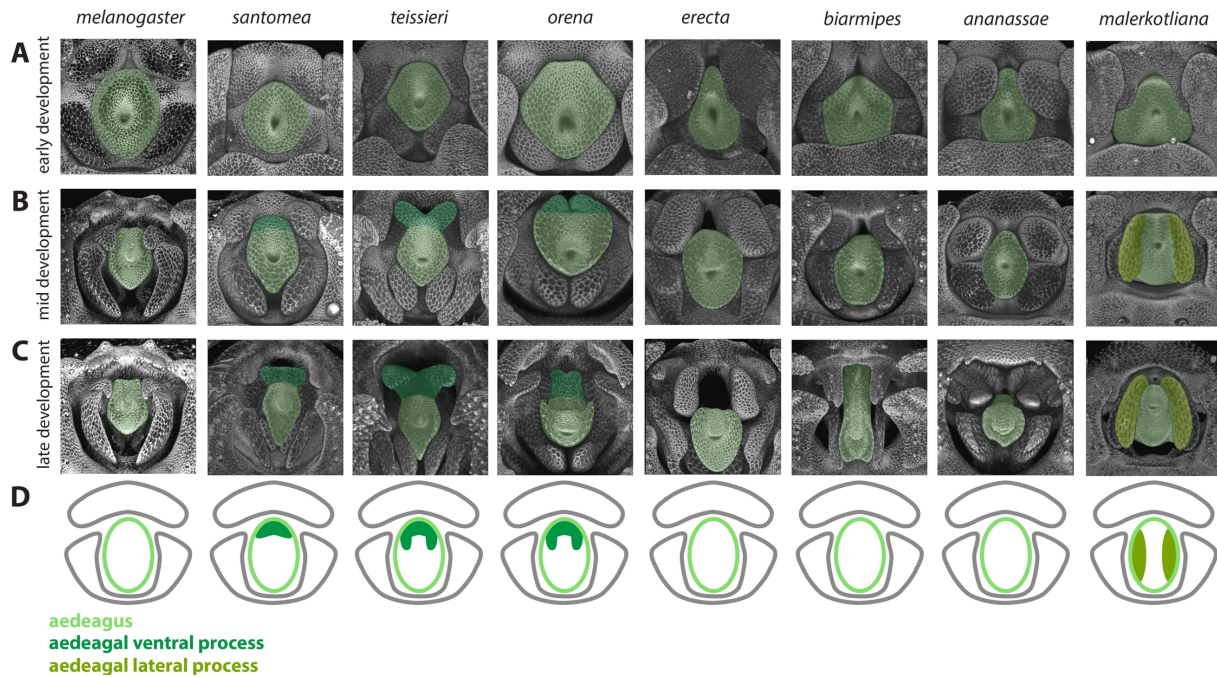

608  
609 **Figure S6:**

610  
611 Developing central primordia of all analyzed species. **A-C)** The aedeagus is highlighted in light  
612 green, the aedeagal ventral process is highlighted in with dark green and the aedeagal lateral  
613 process is highlighted in yellow-green. **D)** Cartoon representations of the aedeagus (light green)  
614 aedeagal ventral process (dark green) and aedeagal lateral process (yellow-green). Note that *D.*  
615 *melanogaster* samples use a transgenic line arm-GFP that also labels the apical cell junctions,  
616 while all other samples are stained for E-cadherin.

## 617 **References:**

- 618
- 619 Abouheif, E. (2008). Parallelism as the pattern and process of mesoevolution. *Evolution and*  
620 *Development*, 10(1), 3–5. <https://doi.org/10.1111/j.1525-142X.2007.00208.x>
- 621 Acebes, A., Cobb, M., & Ferveur, J. F. (2003). Species-specific effects of single sensillum ablation  
622 on mating position in *Drosophila*. *Journal of Experimental Biology*, 206(17), 3095–3100.  
623 <https://doi.org/10.1242/jeb.00522>
- 624 Ahmad, S. M., & Baker, B. S. (2002). Sex-Specific Deployment of FGF Signaling in *Drosophila*  
625 Recruits Mesodermal Cells into the Male Genital Imaginal Disc, 109, 651–661.
- 626 Al Sayad, S., & Yassin, A. (2019). Quantifying the extent of morphological homoplasy: A  
627 phylogenetic analysis of 490 characters in *Drosophila*. *Evolution Letters*, 3(3), 286–298.  
628 <https://doi.org/10.1002/evl3.115>
- 629 Avila, F. W., Sirot, L. K., Laflamme, B. A., Rubinstein, C. D., & Wolfner, M. F. (2011). Insect  
630 seminal fluid proteins: Identification and function. *Annual Review of Entomology*, 56, 21–  
631 40. <https://doi.org/10.1146/annurev-ento-120709-144823>
- 632 Bächli, G., Vilela, C., Andersson Escher, S., & Saura, A. (2004). *The Drosophilidae (Diptera) of 252*  
633 *Fennoscandia and Denmark. Fauna Entomologica Scandinavica*. Brill.
- 634 Bock, I. R., & Wheeler, M. R. (1972). The *Drosophila melanogaster* species group. *The University*  
635 *of Texas Publication*, VII(7213), 1–102.
- 636 Bruce, H. S., & Patel, N. H. (2020). Knockout of crustacean leg patterning genes suggests that  
637 insect wings and body walls evolved from ancient leg segments. *Nature Ecology and*  
638 *Evolution*, 4(12), 1703–1712. <https://doi.org/10.1038/s41559-020-01349-0>
- 639 Bryant, P. J., & Hsei, B. W. (1977). Pattern formation in asymmetrical and symmetrical imaginal  
640 discs of *Drosophila melanogaster*. *American Zoologist*, 17(3), 595–611.  
641 <https://doi.org/10.1093/icb/17.3.595>
- 642 Clark-Hachtel, C. M., & Tomoyasu, Y. (2020). Two sets of candidate crustacean wing  
643 homologues and their implication for the origin of insect wings. *Nature Ecology and*  
644 *Evolution*, 4(12), 1694–1702. <https://doi.org/10.1038/s41559-020-1257-8>
- 645 de Reuille, P. B., Routier-Kierzkowska, A. L., Kierzkowski, D., Bassel, G. W., Schüpbach, T.,  
646 Tauriello, G., ... Smith, R. S. (2015). MorphoGraphX: A platform for quantifying  
647 morphogenesis in 4D. *ELife*, 4(MAY). <https://doi.org/10.7554/eLife.05864>
- 648 Doleschall, C. L. (1858). Derde bijdrage tot de kennis der Dipteren fauna van Nederlandsch  
649 Indie. *Natuurkundig Tijdschrift Voor Nederlandsch Indie*, 17, 73–128.
- 650 Emlen, D. J., Szafran, Q., Corley, L. S., & Dworkin, I. (2006). Insulin signaling and limb-patterning:  
651 Candidate pathways for the origin and evolutionary diversification of beetle “horns.”  
652 *Heredity*, 97(3), 179–191. <https://doi.org/10.1038/sj.hdy.6800868>
- 653 Epper, F. (1983). The Evagination of the Genital Imaginal Discs of *Drosophila melanogaster* II.  
654 Morphogenesis of the Intersexual Genital Disc of the Mutant doublesex-dominant (dsx D).  
655 *Roux's Archives of Developmental Biology*, 192, 280–284.
- 656 Glassford, W. J., Johnson, W. C., Dall, N. R., Smith, S. J., Liu, Y., Boll, W., ... Rebeiz, M. (2015). Co-  
657 option of an Ancestral Hox-Regulated Network Underlies a Recently Evolved  
658 Morphological Novelty Article. *Developmental Cell*, 34(5), 520–531.  
659 <https://doi.org/10.1016/j.devcel.2015.08.005>
- 660 Hagen, J. F. D., Mendes, C. C., Blogg, A., Payne, A., Tanaka, K. M., Gaspar, P., ... Nunes, M. D. S.



- 661 (2019). Tartan underlies the evolution of *Drosophila* male genital morphology. *Proceedings*  
662 *of the National Academy of Sciences of the United States of America*, 116(38), 19025–  
663 19030. <https://doi.org/10.1073/pnas.1909829116>
- 664 Hinman, V. F., Nguyen, A. T., Cameron, R. A., & Davidson, E. H. (2003). Developmental gene  
665 regulatory network architecture across 500 million years of echinoderm evolution.  
666 *Proceedings of the National Academy of Sciences of the United States of America*, 100(23),  
667 13356–13361. <https://doi.org/10.1073/pnas.2235868100>
- 668 Hsu, T. C. (1949). The external genital apparatus of male *Drosophilidae* in relation to  
669 systematics. *The University of Texas Publication*, 4920, 80–142.
- 670 Huang, J., Huang, L., Chen, Y. J., Austin, E., Devor, C. E., Roegiers, F., & Hong, Y. (2012).  
671 Differential regulation of adherens junction dynamics during apical-basal polarization.  
672 *Development*, 139(3), 4001–4013. <https://doi.org/10.1242/jcs.086694>
- 673 Jagadeeshan, S., & Singh, R. S. (2006). A time-sequence functional analysis of mating behaviour  
674 and genital coupling in *Drosophila*: Role of cryptic female choice and male sex-drive in the  
675 evolution of male genitalia. *Journal of Evolutionary Biology*, 19(4), 1058–1070.  
676 <https://doi.org/10.1111/j.1420-9101.2006.01099.x>
- 677 Kamimura, Y. (2007). Twin intromittent organs of *Drosophila* for traumatic insemination.  
678 *Biology Letters*, 3(4), 401–404. <https://doi.org/10.1098/rsbl.2007.0192>
- 679 Kamimura, Y. (2010). Copulation anatomy of *Drosophila melanogaster* (Diptera: *Drosophilidae*):  
680 Wound-making organs and their possible roles. *Zoomorphology*, 129(3), 163–174.  
681 <https://doi.org/10.1007/s00435-010-0109-5>
- 682 Kamimura, Y. (2012). Correlated evolutionary changes in *Drosophila* female genitalia reduce the  
683 possible infection risk caused by male copulatory wounding. *Behavioral Ecology and*  
684 *Sociobiology*, 66(8), 1107–1114. <https://doi.org/10.1007/s00265-012-1361-0>
- 685 Kamimura, Y. (2016). Significance of constraints on genital coevolution: Why do female  
686 *Drosophila* appear to cooperate with males by accepting harmful matings? *Evolution;*  
687 *International Journal of Organic Evolution*, 70(7), 1674–1683.  
688 <https://doi.org/10.1111/evo.12955>
- 689 Kamimura, Y., & Mitsumoto, H. (2011). Comparative copulation anatomy of the *Drosophila*  
690 *melanogaster* species complex (Diptera: *Drosophilidae*). *Entomological Science*, 14(4),  
691 399–410. <https://doi.org/10.1111/j.1479-8298.2011.00467.x>
- 692 Kamimura, Y., & Mitsumoto, H. (2012a). Genital coupling and copulatory wounding in  
693 *drosophila teissieri* (diptera: *Drosophilidae*). *Canadian Journal of Zoology*, 90(12), 1437–  
694 1440. <https://doi.org/10.1139/cjz-2012-0186>
- 695 Kamimura, Y., & Mitsumoto, H. (2012b). Lock-and-key structural isolation between sibling  
696 *Drosophila* species. *Entomological Science*, 15(2), 197–201.  
697 <https://doi.org/10.1111/j.1479-8298.2011.00490.x>
- 698 Kamimura, Y., & Polak, M. (2011). Does surgical manipulation of *drosophila* intromittent organs  
699 affect insemination success? *Proceedings of the Royal Society B: Biological Sciences*,  
700 278(1707), 815–816. <https://doi.org/10.1098/rspb.2010.2431>
- 701 Klaus, A. V., Kulasekera, V. L., & Schawaroch, V. (2003). Three-dimensional visualization of  
702 insect morphology using confocal laser scanning microscopy. *Journal of Microscopy*,  
703 212(2), 107–121. <https://doi.org/10.1046/j.1365-2818.2003.01235.x>
- 704 Lachaise, D., Capy, P., Cariou, M.-L., Joly, D., Lemeunier, F., & David, J. R. (2004). Nine relatives

- 705 from one African ancestor: population biology and evolution of the *Drosophila*  
706 *melanogaster* subgroup species. In R. S. Singh, M. K. Uyenoyama, & S. K. Jain (Eds.), *The*  
707 *Evolution of Population Biology* (pp. 315–344). Cambridge University Press.  
708 <https://doi.org/10.1017/cbo9780511542619.019>
- 709 Lachaise, D., Harry, M., Solignac, M., Lemeunier, F., Benassi, V., & Cariou, M. L. (2000).  
710 Evolutionary novelties in islands: *Drosophila santomea*, a new *melanogaster* sister species  
711 from Sao Tome. *Proceedings of the Royal Society B: Biological Sciences*, 267(1452), 1487–  
712 1495. <https://doi.org/10.1098/rspb.2000.1169>
- 713 Linz, D. M., Hu, Y., & Moczek, A. P. (2020). From descent with modification to the origins of  
714 novelty. *Zoology*, 143(August), 125836. <https://doi.org/10.1016/j.zool.2020.125836>
- 715 Malloch, J. R. (1924). Two *Drosophilidae* from Coimbatore. *Memoirs of the Department of*  
716 *Agriculture in India. Entomological Series*, 8(6), 63–65.
- 717 Markow, T. A., & O’Grady, P. M. (2006). *Drosophila: A Guide to Species Identification and Use.*  
718 *Academic Press*. London.
- 719 Masly, J. P., & Kamimura, Y. (2014). Asymmetric mismatch in strain-specific genital morphology  
720 causes increased harm to *drosophila* females. *Evolution*, 68(8), 2401–2411.  
721 <https://doi.org/10.1111/evo.12436>
- 722 Mattei, A. L., Riccio, M. L., Avilaa, F. W., Wolfner, M. F., & Denlinger, D. L. (2015). Integrated 3D  
723 view of postmating responses by the *Drosophila melanogaster* female reproductive tract,  
724 obtained by micro-computed tomography scanning. *Proceedings of the National Academy*  
725 *of Sciences of the United States of America*, 112(27), 8475–8480.  
726 <https://doi.org/10.1073/pnas.1505797112>
- 727 Meigen, J. W. (1830). *Systematische Beschreibung der bekannten europäischen zweiflügeligen*  
728 *Insekten*. Schulze.
- 729 Moczek, A. P. (2008). On the origins of novelty in development and evolution. *BioEssays*, 30(5),  
730 432–447. <https://doi.org/10.1002/bies.20754>
- 731 Muto, L., Kamimura, Y., Tanaka, K. M., & Takahashi, A. (2018). An innovative ovipositor for  
732 niche exploitation impacts genital coevolution between sexes in a fruit-damaging  
733 *Drosophila*. *Proceedings of the Royal Society B: Biological Sciences*.  
734 <https://doi.org/10.1098/rspb.2018.1635>
- 735 Obbard, D. J., MacLennan, J., Kim, K. W., Rambaut, A., O’Grady, P. M., & Jiggins, F. M. (2012).  
736 Estimating divergence dates and substitution rates in the *drosophila* phylogeny. *Molecular*  
737 *Biology and Evolution*, 29(11), 3459–3473. <https://doi.org/10.1093/molbev/mss150>
- 738 Okada, T. (1954). Comparative morphology of the *drosophilid* flies. I. Phallic organs of the  
739 *melanogaster* group. *Kontyu*, 22, 36–46.
- 740 Parshad, R., & Paika, I. J. (1964). *Drosophilid* survey of India. II. Taxonomy and cytology of the  
741 subgenus *Sophophora* (*Drosophila*). *Research Bulletin of the Panjab University. Science.*,  
742 15, 225–252.
- 743 Peluffo, A. E., Nuez, I., Debat, V., Savaiaar, R., Stern, D. L., & Orgogozo, V. (2015). A major locus  
744 controls a genital shape difference involved in reproductive isolation between *Drosophila*  
745 *yakuba* and *Drosophila santomea*. *G3: Genes, Genomes, Genetics*, 5(12), 2893–2901.  
746 <https://doi.org/10.1534/g3.115.023481>
- 747 Peluffo, A., Hamdani, M., Vargas-Valderrama, A., David, J., Mallard, F., Graner, F., & Courtier-  
748 Orgogozo, V. (2021). A morphological trait involved in reproductive isolation between

- 749 Drosophila sister species is sensitive to temperature. *BioRx*.  
750 <https://doi.org/10.1101/2020.01.20.911826>
- 751 Prud'Homme, B., Minervino, C., Hocine, M., Cande, J. D., Aouane, A., Dufour, H. D., ... Gompel,  
752 N. (2011). Body plan innovation in treehoppers through the evolution of an extra wing-like  
753 appendage. *Nature*, *473*(7345), 83–86. <https://doi.org/10.1038/nature09977>
- 754 Rebeiz, M., Patel, N. H., & Hinman, V. F. (2015). Unraveling the Tangled Skein: The Evolution of  
755 Transcriptional Regulatory Networks in Development. *Annual Review of Genomics and*  
756 *Human Genetics*, *16*(1), 103–131. [https://doi.org/10.1146/annurev-genom-091212-  
757 \*153423\*](https://doi.org/10.1146/annurev-genom-091212-153423)
- 758 Rebeiz, M., & Tsiantis, M. (2017). Enhancer evolution and the origins of morphological novelty.  
759 *Current Opinion in Genetics and Development*, *45*, 115–123.  
760 <https://doi.org/10.1016/j.gde.2017.04.006>
- 761 Rice, G., David, J. R., Kamimura, Y., Masly, J. P., Alistair, P., Nagy, O., ... Yassin, A. (2019). A  
762 standardized nomenclature and atlas of the male terminalia of *Drosophila melanogaster*.  
763 *Fly*, *13*(1–4), 51–64. <https://doi.org/10.1080/19336934.2019.1653733>
- 764 Robertson, H. (1988). Mating Asymmetries and Phylogeny in the *Drosophila melanogaster*  
765 Species Complex, *42*.
- 766 Shao, L., Chung, P., Wong, A., Siwanowicz, I., Kent, C. F., Long, X., & Heberlein, U. (2019). A  
767 Neural Circuit Encoding the Experience of Copulation in Female *Drosophila*. *Neuron*,  
768 *102*(5), 1025–1036.E6. <https://doi.org/10.1016/j.neuron.2019.04.009>
- 769 Smith, S. J., Davidson, L., & Rebeiz, M. (2019). Expansion of apical extracellular matrix underlies  
770 the morphogenesis of a recently evolved structure. *BioRxiv*.  
771 <https://doi.org/doi.org/10.1101/686089>
- 772 Steedman, H. F. (1958). Dimethyl Hydantoin Formaldehyde: A new Water-soluble Resin for Use  
773 as a Mounting Medium. *Journal of Cell Science*, *99*(4), 451–452.  
774 <https://doi.org/10.1163/187529266X00220>
- 775 Tanaka, K., Barmina, O., & Kopp, A. (2009). Distinct developmental mechanisms underlie the  
776 evolutionary diversification of *Drosophila* sex combs. *Proceedings of the National Academy*  
777 *of Sciences*, *106*(12), 4764–4769. <https://doi.org/10.1073/pnas.0807875106>
- 778 Tsacas, L. (1971). *Drosophila teissieri*, nouvelle espece africaine du groupe melanogaster et  
779 note sur deux autres especes nouvelles pour l'Afrique (Dipt. Drosophilidae). *Bulletin de La*  
780 *Société Entomologique de France*, *76*, 35–45.
- 781 Tsacas, L., Bocquet, C., Daguzan, M., & Mercier, A. (1971). Comparaison des genitalia males de  
782 *Drosophila melanogaster*, de *Drosophila simulans* et de leurs hybrids. *Annales de La*  
783 *Société Entomologique de France*, *7*, 75–93. Retrieved from  
784 <https://ci.nii.ac.jp/naid/10030580910/>
- 785 Tsacas, L., & David, J. (1978). Une septieme espece appartenant au sous-groupe *Drosophila*  
786 *melanogaster* Meigen: *Drosophila orena* spec. nov. du Cameroun. (Diptera: Drosophilidae).  
787 *Beiträge Zur Entomologie*, *28*, 179–182.
- 788 Tsacas, L., & Lachaise, D. (1974). Quatre nouvelles especes de la Cote-d'Ivoire du genre  
789 *Drosophila*, groupe melanogaster, et discussion de l'origine du sous-groupe melanogaster  
790 (Diptera: Drosophilidae). *Annales de l'Université d'Abidjan Série E: Ecologie*, *7*, 193–211.
- 791 van Emden, F., & Hennig, W. (1970). *Taxonomists' glossary of genitalia of insects*. (S. L. Tuxen,  
792 Ed.) (2nd ed.). Munksgaard, Copenhagen.

- 793 Vincent, B. J., Rice, G. R., Wong, G. M., Glassford, W. J., Downs, K. I., Shastay, J. L., ... Rebeiz, M.  
794 (2019). An atlas of transcription factors expressed in the *Drosophila melanogaster* pupal  
795 terminalia. *G3: Genes/Genomes/Genetics*, 9(December), 3961–3972.  
796 <https://doi.org/10.1101/677260>
- 797 Wagner, G. (2007). The developmental genetics of homology. *Nature Reviews Genetics*, 8(6),  
798 473–479. <https://doi.org/10.1038/nrg2099>
- 799 Wagner, G. P., & Lynch, V. J. (2010). Evolutionary novelties. *Current Biology*, 20(2), 48–52.  
800 <https://doi.org/10.1016/j.cub.2009.11.010>
- 801 Yassin, A., & Orgogozo, V. (2013). Coevolution between Male and Female Genitalia in the  
802 *Drosophila melanogaster* Species Subgroup. *PLoS ONE*, 8(2).  
803 <https://doi.org/10.1371/journal.pone.0057158>  
804
